1 **Title:** The chaperonin GroESL facilitates *Caulobacter crescentus* cell division by supporting the  
2 function of the actin homologue FtsA

3

4 **Running title:** GroESL folding supports FtsA in *Caulobacter* cell division

5

6 **Authors:** Kristen Schroeder<sup>a</sup>, Kristina Heinrich<sup>a</sup>, Ines Neuwirth<sup>a</sup> and Kristina Jonas<sup>a#</sup>

7

8 **Affiliations:** <sup>a</sup> Science for Life Laboratory and Department of Molecular Bioscience, The

9 Wenner-Gren Institute, Stockholm University, 106 91 Stockholm, Sweden

10

11 # Correspondence: [kristina.jonas@su.se](mailto:kristina.jonas@su.se), Phone: +46 8 16 2580

## 12 **Abstract**

13           The highly conserved chaperonin GroESL performs a crucial role in protein folding,  
14 however the essential cellular pathways that rely on this chaperone are underexplored. Loss of  
15 GroESL leads to severe septation defects in diverse bacteria, suggesting the folding function of  
16 GroESL may be integrated with the bacterial cell cycle at the point of cell division. Here, we  
17 describe new connections between GroESL and the bacterial cell cycle, using the model  
18 organism *Caulobacter crescentus*. Using a proteomics approach, we identify candidate GroESL  
19 client proteins that become insoluble or are degraded specifically when GroESL folding is  
20 insufficient, revealing several essential proteins that participate in cell division and  
21 peptidoglycan biosynthesis. We demonstrate that other cell cycle events such as DNA replication  
22 and chromosome segregation are able to continue when GroESL folding is insufficient, and find  
23 that deficiency of the bacterial actin homologue FtsA function mediates the GroESL-dependent  
24 block in cell division. Our data suggest that a GroESL-FtsA interaction is required to maintain  
25 normal dynamics of the FtsZ scaffold and divisome functionality in *C. crescentus*. In addition to  
26 supporting FtsA function, we show that GroESL is required to maintain the flow of  
27 peptidoglycan precursors into the growing cell wall. Linking a chaperone to cell division may be  
28 a conserved way to coordinate environmental and internal cues that signal when it is safe to  
29 divide.

30

## 31 **Importance**

32           All organisms depend on mechanisms that protect proteins from misfolding and  
33 aggregation. GroESL is a highly conserved molecular chaperone that functions to prevent protein  
34 aggregation in organisms ranging from bacteria to humans. Despite detailed biochemical

35 understanding of GroESL function, the *in vivo* pathways that strictly depend on this chaperone  
36 remain poorly defined in most species. This study provides new insights into how GroESL is  
37 linked to the bacterial cell division machinery, a crucial target of current and future antimicrobial  
38 agents. We identify a functional interaction between GroESL and FtsA, a conserved bacterial  
39 actin homologue, suggesting that as in eukaryotes, some bacteria exhibit a connection between  
40 cytoskeletal actin proteins and chaperonins. Our work further defines how GroESL is integrated  
41 with cell wall synthesis, and illustrates how highly conserved folding machines ensure the  
42 functioning of fundamental cellular processes during stress.

43

44 **Keywords**

45 chaperonin, protein folding, bacterial cell division, FtsA, GroESL, peptidoglycan

46

## 47 **Introduction**

48 All life must monitor and adjust the vital processes of growth and division in response to  
49 external and internal environmental cues. Prokaryotic model organisms offer an accessible  
50 system to study how essential biological processes are regulated in response to these cellular and  
51 environmental signals. Molecular chaperones are ubiquitous proteins with high sequence  
52 conservation, and studying protein folding dynamics in bacterial systems has been crucial in  
53 understanding the fundamental processes that assist all organisms in building and maintaining  
54 functional proteins.

55 During biosynthesis, some proteins must overcome energy barriers in order to achieve  
56 their native fold (1). For these proteins, interaction with ATP-powered chaperones assists them  
57 in attaining a functional conformation on a biologically relevant time scale *in vivo* (1). This  
58 chaperone interaction is not limited to biosynthesis, as changes in intracellular conditions, for  
59 example temperature or oxidative stress, or the presence of toxic compounds, can destabilize  
60 folding of a wide array of proteins (2–4), which may then require refolding. To adjust chaperone  
61 folding capacity to these different folding demands, the expression of chaperone genes can be  
62 increased above basal levels through stress-responsive transcriptional control, for example  
63 through induction by the heat shock sigma factor (5). In this way, chaperone folding capacity is  
64 available for synthetic processes during optimal conditions, and increased to rescue misfolding  
65 proteins during diverse stresses.

66 The majority of ATP-powered protein folding in prokaryotes is carried out by the highly  
67 conserved DnaK/J/GrpE-ClpB bichaperone system and the GroES/EL chaperonin machine (1),  
68 which are assisted in interacting with their client proteins by a network of less-conserved  
69 holdases, including small heat shock proteins and chaperedoxins (6). GroEL (Hsp60, Cpn60) is a

70 heat shock protein that oligomerizes into a tetradecameric double ring structure with two central  
71 cavities that can capture unfolded proteins via their solvent-exposed hydrophobic residues (7).  
72 The GroES (Hsp10, Cpn10) co-chaperonin then binds as a lid over the GroEL-client complex,  
73 encapsulating client proteins and thus providing a segregated environment to assist with folding  
74 (7). While the number and arrangement of the *groES groEL* genes varies across bacteria, they are  
75 most often found in a single copy together in an operon that allows both for housekeeping  
76 expression, for example from a  $\sigma^{70}$ -dependent promoter, as well as stress-responsive expression,  
77 for example from a  $\sigma^{32}$ -dependent promoter or HrcA repressor sequences (5, 8, 9).

78         Despite detailed description of GroESL folding mechanics and a good understanding of  
79 the regulation of *groESL* transcription, comparably few studies exist examining the role of  
80 chaperonins in physiological processes. With the exception of some Mollicutes (10), GroESL is  
81 essential in all bacterial species investigated to date (9, 11–14). Several of these organisms  
82 exhibit a relationship between chaperonin availability and the cell cycle, as cell division is  
83 blocked when GroESL levels are reduced (13–15). During bacterial cell division the presence,  
84 location, and quantity of many different classes of proteins, as well as the remodelling of the cell  
85 envelope must be tightly controlled in order to successfully make two daughter cells. The  
86 regulation of these proteins can occur at the level of synthesis, degradation, conformation,  
87 localization and activity (16, 17), however the contribution of protein folding state and  
88 chaperone interactions to cell division is not yet well understood.

89         The most well-studied bacterial chaperonin is that of *Escherichia coli*, where ~250  
90 proteins have been identified as interacting partners of GroESL (18, 19). Of these client proteins,  
91 57 have been shown to obligately depend on GroESL for folding into the native state (classified  
92 as obligate, or Type IV GroESL substrates), including 6 essential proteins (18–20). One of the

93 identified essential obligate GroESL substrates is the cell division protein FtsE (19), however  
94 while a functional deficit of this protein may contribute to the cell division defect reported during  
95 GroESL depletion in *E. coli* (21), the requirement for FtsE function can be bypassed by altering  
96 growth conditions, and it therefore remains unclear if FtsE is conditionally linked to GroESL in  
97 this organism. Chaperonin studies in other bacteria have identified a few proteins from the  
98 GroESL client protein pool (22–24), and it remains poorly understood how GroESL function  
99 impacts the cell cycle and other physiological processes in these organisms.

100         The model organism *Caulobacter crescentus* is a Gram-negative oligotrophic alpha-  
101 proteobacterium with a dimorphic lifestyle that produces two morphologically distinct daughter  
102 cells (25). This asymmetric life cycle has made *Caulobacter* a powerful model for investigating  
103 events of the cell cycle. In particular, cell division has been well described in this organism,  
104 which has led to important advances being made in understanding the conserved mechanisms  
105 mediating cell division in bacteria (26, 27). Similarly to other bacteria, *C. crescentus* becomes  
106 filamentous when GroESL is depleted (15), indicating an involvement of GroESL in the cell  
107 cycle. However, the precise role of GroESL in *Caulobacter* cell cycle progression and cell  
108 division has not been studied so far.

109         In this study, we establish the connection between GroESL folding and cell division in *C.*  
110 *crescentus*. We have identified a subset of the proteome that changes solubility depending on the  
111 presence of the chaperonin, and show that several proteins involved in cell division and  
112 peptidoglycan (PG) biosynthesis become insoluble when GroESL folding capacity is reduced.  
113 Furthermore, we find that the bacterial actin homologue FtsA is responsible for mediating the  
114 filamentation phenotype observed when GroESL-mediated folding is insufficient, suggesting a  
115 relationship between chaperonins and actin-like proteins in prokaryotes. Integrating chaperonin

116 folding into cell division in this way may represent a way of coordinating environmental and  
117 internal cues that signal when it is safe to divide.

118

## 119 **Results**

### 120 *GroESL folding insufficiency results in filamentation*

121 As GroESL is essential in *Caulobacter* and cannot be deleted (12), we made use of the  
122 previously described *C. crescentus* strain SG300, where the regulatory region upstream of  
123 *groESL* is replaced by a xylose-inducible promoter (Figure 1A) (12). When xylose is removed  
124 from the growth media, GroESL is diluted from the growing culture over several hours (Figure  
125 1B). As GroESL levels decline, the demand for chaperonin-mediated folding exceeds what can  
126 be provided, resulting in the development of phenotypes associated with client protein  
127 misfolding (Figure 1C). In *C. crescentus*, cells grow into long filaments featuring wide segments  
128 interspersed with irregular shallow constrictions (Figure 1C) (15). When GroESL levels fall to  
129 30% of the wild type (4h depletion, Figure 1D), cell lengths diverge from normal population  
130 lengths, and the shallow constrictions are properly localized at midcell (Figure 1C).

131 As protein folding is destabilized by temperature stress, we also investigated the heat  
132 sensitivity of the GroESL depletion strain, which at maximal induction produces less GroESL  
133 (73%) than the wild type (Figure 1B), and is unable to upregulate *groESL* transcription during  
134 stress conditions. At the optimal growth temperature of 30°C, no difference in viability was  
135 observed between wild type *C. crescentus* and the GroESL depletion strain grown in the  
136 presence of xylose (Figure 1E). However, a mild temperature increase to 36°C caused cultures of  
137 the GroESL depletion strain to filament and become inviable (Figure 1C, D), emphasizing the  
138 importance of upregulating GroESL to provide chaperonin-mediated folding at elevated

139 temperatures. Wild type *C. crescentus* also exhibits filamentation in response to diverse  
140 unfolding stresses (28), although a higher temperature of 40 to 42°C is required to elicit a similar  
141 response. Comparison of the insoluble, detergent resistant protein fraction of wild type cultures  
142 with that of the GroESL depletion strain either during depletion or 36°C treatment in the  
143 presence of xylose revealed mild aggregation, or solubility changes, in a small number of  
144 proteins (Figure 1F). Together, these results indicate that proteostasis and growth are generally  
145 maintained in the early stages of GroESL insufficiency. Therefore, the division defect is likely to  
146 result from the misfolding of one or more specific proteins linked to the cell cycle that depend on  
147 an interaction with GroESL for functionality.

148

149 *Chromosome replication and cell cycle transcription continue during GroESL insufficiency*

150 *C. crescentus* filamentation can result from perturbations in DNA replication,  
151 chromosome segregation, the cell cycle transcriptional program, or inhibition of the cell division  
152 machinery. To identify which stage(s) of the cell cycle GroESL folding is required for, we  
153 assessed the consequences of GroESL depletion on each of these processes. Measuring DNA  
154 content by flow cytometry revealed that GroESL-depleting cultures accumulate additional  
155 chromosomes, even late in depletion (Figure 2A), demonstrating that DNA replication continues  
156 when GroESL folding is insufficient. Consistent with this, multiple well-spaced origins of  
157 replication were distributed throughout the cytoplasm (Figure 2B), and the chromosomes were  
158 spread throughout the entirety of the cell body (Figure 2C). These data argue against a problem  
159 with chromosome segregation, which generally features chromosome-free spaces or mislocalized  
160 origins of replication (29).



161           The transcriptional circuit driving the cell cycle is poised to halt at the appearance of  
162 many stress inputs (28, 30, 31), therefore we assessed GroESL-depleted cells for the presence of  
163 the major cell cycle regulators CtrA, DnaA, CcrM, GcrA and SciP, which drive the cell cycle-  
164 dependent transcriptional program in *C. crescentus* (32–36). CtrA, DnaA, GcrA and CcrM  
165 remained at near wild type levels during the four hours of GroESL depletion when the  
166 filamentation phenotype emerges, while SciP levels showed a reduction during this time frame  
167 (Figure 2D). It is possible that this reduction of SciP is caused by its increased degradation by the  
168 protease Lon, which is known to degrade SciP. Like other components of the proteostasis  
169 network (12, 15), we found Lon levels to increase in GroESL-depleted cells, offering a potential  
170 explanation for this observation (Supplemental Figure 1).

171           To more directly test if loss of GroESL-mediated folding affects cell cycle-regulated  
172 transcription in *Caulobacter*, we performed RNAseq analysis comparing wild type *C. crescentus*  
173 transcription with that during early GroESL depletion (Figure 2E). This analysis showed that the  
174 transcriptional regulons controlled by all five cell cycle regulators, including SciP, remained  
175 largely unchanged when GroESL folding is reduced (Figure 2F). Together these results show  
176 that DNA replication, chromosome segregation, and the cell cycle-dependent transcriptional  
177 program are not markedly affected by a reduction in available GroESL. Therefore, one or more  
178 proteins of the cell division apparatus may be specifically sensitive to the availability of GroESL,  
179 and mediate the filamentation phenotype of GroESL depletion.

180

181 *Loss of GroESL is associated with changes in solubility of division and PG synthesis proteins*

182           To identify candidate division-linked proteins whose folding is perturbed by reduced  
183 GroESL, we utilized a quantitative proteomics approach using isobaric tandem mass tag (TMT)

184 mass spectrometry to identify proteins enriched in the insoluble, detergent resistant fraction of  
185 cultures in early GroESL depletion (Figure 3A). We identified 630 proteins whose presence in  
186 the insoluble fraction was significantly different between wild type and GroESL depletion,  
187 including 167 proteins with abundances increased at least 1.5-fold ( $p < 0.05$ ) (Supplemental  
188 Table 2). The best predictor of *E. coli* GroESL client proteins is a specific physicochemical  
189 signature (37), part of which is the presence of specific structural folds, therefore we analysed  
190 the folds present in our identified population of enriched insoluble proteins. As in *E. coli* (18, 19,  
191 38), we found the TIM beta/alpha barrel fold (c.1) to be over-represented in proteins enriched in  
192 the *C. crescentus* GroESL-depleted insoluble fraction (Figure 3B). This enrichment of the c.1  
193 fold is specific to GroESL depletion, as analysis of fold prevalence in the insoluble fraction of  
194 heat-stressed *C. crescentus* revealed other fold classes to be more prevalent in this condition  
195 (Supplemental Figure 2) (39). Among the proteins enriched in the insoluble fraction of GroESL-  
196 depleted cells, we identified five essential proteins that are linked to cell division and that  
197 function in the cell envelope; FzlA, FtsA, MurA, MurG, and DapA, as well as KidO, a non-  
198 essential oxidoreductase with a TIM beta/alpha barrel fold (Figure 3A) (40, 41). FzlA, FtsA and  
199 KidO are proteins that directly interact with FtsZ, the major structural component of the  
200 *Caulobacter* divisome (40–44), while MurA, MurG and DapA are part of the PG biosynthesis  
201 pathway (45–48), which is critical for maintaining the cell envelope during normal growth and  
202 building the new poles during division.

203 To validate the mass spectrometry results, we assessed the solubility of native FzlA and a  
204 MurG-mCherry fusion, integrated at the native chromosomal locus, when GroESL availability  
205 was reduced (Figure 3C, 3D). This confirmed that these proteins are significantly enriched in the  
206 insoluble fraction when GroESL was depleted (Figure 3C, 3D). Notably, a large proportion of

207 both FzlA and MurG-mCherry was present in the soluble fractions. We reasoned that this could  
208 be either due to the majority of the protein achieving a folded and soluble state before GroESL  
209 levels become limiting, or because most of the newly produced protein can correctly fold in the  
210 absence of GroESL. To discriminate between these possibilities, we assessed more directly how  
211 GroESL availability affects *de novo* production of the candidate proteins. For this, we tagged  
212 FzlA, KidO, DapA, MurA, and MurG with a small M2 tag, induced the expression of these  
213 fusion proteins for two hours in either GroESL-depleted (6 hours) or non-depleted conditions,  
214 and then quantified their abundance in the total and soluble protein fractions (Figure 3E). We  
215 attempted to tag FtsA to include in this analysis, however as FtsA does not tolerate tags at either  
216 terminus, and tagging this protein has been demonstrated to alter its stability and function (49),  
217 we could not include it in our analysis. Our data show that similar amounts of M2-FzlA were  
218 present in the soluble and total protein fractions of GroESL-depleted and non-depleted cultures  
219 (Figure 3E), indicating that FzlA can be produced and accumulate in a soluble state with reduced  
220 levels of GroESL. By contrast, the M2-DapA, MurG-M2, MurA-M2, and KidO-M2 fusions were  
221 only present at high levels when GroESL levels were sufficient for viability (Figure 3E). In  
222 particular, *de novo* synthesized DapA and MurA were not tolerated in cells lacking GroESL  
223 (Figure 3E), therefore the accumulation of these proteins is strictly dependent on GroESL  
224 availability. We were however able to detect an enrichment in insoluble, native DapA and MurA  
225 in early GroESL depletion (Figure 3A), indicating that synthesis of these proteins during  
226 insufficient GroESL folding results in production of insoluble protein, which is then degraded.  
227 Similar behaviour is observed for several obligate *E. coli* GroESL substrates, including DapA  
228 (19, 20, 47). Our data suggest that DapA, MurA, MurG and KidO could be GroESL clients in *C.*  
229 *crescentus*, as their accumulation depends on the presence of GroESL. As soluble FzlA was

230 produced and accumulated in GroESL-depleted cultures, we conclude that this protein is unlikely  
231 to be an obligate GroESL client, but do not yet exclude a contribution to the cell division defect  
232 of GroESL-depleted cells.

233

234 *GroESL folding supports PG biosynthesis through MurG, MurA, and DapA*

235 DapA, MurA, and MurG are all part of the PG biosynthetic pathway, which functions to  
236 build and maintain the outer structure of growing cells, including the new cell poles during  
237 division (16). We first focussed on this group of proteins and investigated the relationship  
238 between PG biosynthesis and GroESL folding. First, we sought additional support for our data  
239 that the divisome-associated protein MurG may require an interaction with GroESL to reach a  
240 functional state, and determined the localization of MurG-mCherry during GroESL depletion.  
241 We found that MurG-mCherry formed multiple foci along the length of the cell (Figure 4A),  
242 which may be indicative of aggregation (39), or alternatively, as MurG function is associated  
243 with FtsZ and the Z-ring (26, 45, 48), its association with partially assembled or partially  
244 functional divisome components. Importantly, we observed that in a subpopulation of cells  
245 (30%) MurG-mCherry formed polar foci (Figure 4A, 4B). These polar MurG-mCherry foci did  
246 not occur in non-depleting conditions, suggesting that they are caused by reduced GroESL  
247 availability. As condensation of *Caulobacter* FtsZ, and therefore the divisome, is inhibited at the  
248 poles (50), and furthermore as the *Caulobacter* poles are stable regions where new PG is not  
249 inserted (45), this observation is consistent with MurG-mCherry clustering in a non-functional  
250 state.

251 PG precursors are built in the cytoplasm through the sequential action of a series of  
252 enzymes, including MurA and MurG, and metabolites for the pathway are supplied by DapA

253 (Figure 4C). The first committed step of PG biosynthesis requires the activity of MurA, which is  
254 targeted by the antibiotic fosfomycin (51, 52). To assess the stability of PG biosynthesis when  
255 GroESL folding is reduced, we determined the sensitivity of the GroESL depletion strain, grown  
256 in non-depleting conditions, to fosfomycin. Interestingly, the GroESL depletion strain  
257 demonstrated hypersensitivity towards this antibiotic (Figure 4D), indicating that PG  
258 biosynthesis is highly sensitive to changes in GroESL availability. In *E. coli*, DapA is an obligate  
259 GroESL substrate that catalyses the formation of 4-hydroxy-tetrahydrodipicolinate, a precursor  
260 of meso-diaminopimelate (DAP) that is required for normal PG synthesis (47). Addition of DAP  
261 to the growth medium prevents lysis due to DapA degradation in GroESL-depleted *E. coli* (47),  
262 therefore we supplemented fosfomycin-treated *C. crescentus* cultures with DAP in an attempt to  
263 bypass the essential function of this protein (Figure 4D). DAP supplementation was unable to  
264 restore fosfomycin resistance (Figure 4D), therefore we also tested the effect of DAP on  
265 GroESL-depleting cultures in the absence of the antibiotic. *C. crescentus* supplemented with  
266 DAP still became filamentous during GroESL depletion, however the cells were slightly shorter  
267 in length, indicating some improvement in the phenotype (Figure 4E, Supplemental Figure 3).  
268 These data are consistent with the finding that DapA is not the only protein of the PG  
269 biosynthetic pathway that has solubility changes when GroESL levels become limiting, but that  
270 the proteins MurA and MurG may also require GroESL-mediated folding.

271 To address the possible interaction of other PG biosynthetic pathway enzymes with  
272 GroESL, we attempted to increase the activity of these proteins by increasing their gene copy  
273 number and therefore expression levels, a method that has been used to investigate the  
274 contribution of specific clients to the phenotype of GroESL depletion in *E. coli* (14). Increased  
275 expression of these proteins did not improve fosfomycin sensitivity (Figure 4F), suggesting again

276 that the PG biosynthesis pathway has multiple points of interaction with GroESL. We  
277 additionally tested the involvement of MreB, which organizes PG insertion in *Caulobacter* and is  
278 classified as a Class II, non-obligate substrate of *E. coli* GroESL (19, 48), and also as a client of  
279 DnaK (53). However, increased expression of the actin homologue MreB did not rescue PG  
280 hypersensitivity, and the GroESL depletion strain was not more sensitive to the MreB inhibitor  
281 A22 than wild type at the concentrations tested (Supplemental Figure 4). Together, our results  
282 indicate that GroESL supports the folding and solubility of several proteins of the PG  
283 biosynthesis pathway, including MurG, MurA and DapA. Decreased GroESL folding capacity  
284 results in reduced functionality of this pathway, and consequently increased fosfomycin  
285 sensitivity.

286

287 *The Z-ring stalls shortly after GroESL levels begin to decline*

288 In addition to proteins required for PG biosynthesis, we identified FzlA, FtsA, and KidO  
289 as being enriched in the insoluble fraction of GroESL-depleted cells (Figure 3A). All three of  
290 these proteins interact with FtsZ, and FzlA and FtsA provide essential regulation of FtsZ  
291 polymer formation, and consequently its function in coordinating cell division (42, 44, 54, 55).  
292 Therefore, we determined the effects of GroESL depletion on the formation and function of the  
293 Z-ring. We first assessed the condensation of FtsZ during GroESL depletion using a merodiploid  
294 FtsZ-eYFP fusion reporter (Figure 5A) (50). We found that before significant GroESL-mediated  
295 cell length changes occur during GroESL depletion, the Z-ring was present at midcell in a larger  
296 proportion of the population than in actively dividing cells (Figure 5B). By 4h depletion,  
297 multiple FtsZ foci were present in disorganized locations along the cell length, with no obvious  
298 bias in positioning other than that FtsZ foci remained excluded from the poles (Figure 5A, 5B).

299 Therefore, when GroESL levels are reduced, FtsZ polymerizes and condenses but stalls before  
300 division is complete, with many of the Z-rings assembled within two hours of GroESL depletion  
301 failing to achieve division. The ability to divide is lost asynchronously, as division is observed to  
302 occur in some cells later in depletion, suggesting that the remaining chaperonin may occasionally  
303 provide enough folding of the required division protein(s) (Supplemental Movie 1). Collectively,  
304 these results indicate that a stalling of the Z-ring immediately precedes the cell length changes  
305 observed during early GroESL depletion, suggesting that misfolding of an FtsZ-interacting  
306 protein is the primary driver of the cell division defect.

307 To confirm that FtsZ stalling at midcell is not an artifact of the fluorescent fusion  
308 construct, we further assessed Z-ring formation using a fluorescent-D-amino acid (HADA)  
309 (Figure 5C), which marks the active PG incorporation at midcell that is coordinated by FtsZ, as  
310 well as that coordinated by the elongasome (56). In agreement with the FtsZ fluorescent fusion,  
311 we observed that almost all of the population exhibited a bright midcell focus of PG  
312 incorporation at 2h GroESL depletion, in contrast to actively dividing cells (Figure 5C).  
313 Additionally, foci became disorganized and were found along the cell length at later time points  
314 (Figure 5C), indicating that the Z-ring continues to coordinate PG insertion while being unable to  
315 complete cell division. Furthermore, we did not observe FtsZ foci or foci of PG insertion to  
316 occur at the poles with HADA staining, consistent with our hypothesis that some of the MurG  
317 present in GroESL-depleted cells is clustering in a non-functional, insoluble state.

318

319 *GroESL folding regulates FtsZ ring function not through FzlA, but FtsA*

320 Because both FzlA and FtsA are critical for regulating FtsZ dynamics (42, 44, 55), we  
321 hypothesized that incorrect or insufficient folding of either, or both, of these proteins may lead to

322 the observed changes in FtsZ behavior at the early stages of GroESL depletion. To evaluate the  
323 effects of FzlA on Z-ring function, we made use of a previously established  $\Delta fzlA$  suppressor  
324 strain (54), in which a point mutation in FtsW (A246T) compensates for loss of the essential  
325 function of FzlA. However, depletion of GroESL in the  $\Delta fzlA$  suppressor strain did not improve  
326 or delay the filamentation phenotype (Figure 6A, B), and the development of the characteristic  
327 irregularly spaced constrictions was still observed (Figure 6A). This result suggests that FzlA  
328 does not contribute significantly to the cell division defect of GroESL depletion. While not  
329 essential for *Caulobacter* division (57), we also tested the involvement of the ABC transporter  
330 and FtsZ-interacting protein FtsE (Figure 6A, 6B), due to its involvement in the GroESL  
331 depletion phenotype of *E. coli* (19, 21). However, as with FzlA, the GroESL phenotype  
332 developed similarly in a *C. crescentus* strain lacking *ftsE* (Figure 6A, 6B), confirming FtsE does  
333 not mediate the phenotype in this organism.

334 We next investigated whether impaired functioning of FtsA contributes to the  
335 filamentation observed in GroESL depletion. In particular, FtsA seemed a promising candidate,  
336 as FtsA depletion results in filamentous cells with shallow, irregularly spaced constrictions that  
337 resemble the phenotype of GroESL depletion (58). As FtsA cannot be suppressed or deleted, we  
338 sought to evaluate if increased FtsA production could reduce or delay the effects of insufficient  
339 GroESL folding and alleviate the GroESL depletion phenotype (Figure 6C). Strikingly, when  
340 FtsA was produced from an additional chromosomal locus we observed a significant delay in the  
341 development of filamentation during GroESL depletion (Figure 6C, 6D). Cells were shorter and  
342 contained fewer constrictions than in GroESL-depleted cultures without additional FtsA (Figure  
343 6C, 6D), suggesting additional division events had occurred. These observations are consistent  
344 with increased FtsA production being able to compensate for a reduction in the ability to



345 efficiently fold FtsA. It is important to note that the FtsA expression levels in this genetic context  
346 did not lead to the filamentation phenotypes observed with strong overexpression of FtsA in wild  
347 type *C. crescentus* (Supplemental Figure 5) (59). Growth analysis revealed that production of  
348 extra FtsA improved growth capacity (Figure 6E), thus excluding the possibility that the shorter  
349 cells observed during GroESL depletion in the presence of additional FtsA were due to growth  
350 arrest or a decrease in growth rate. Finally, the shorter cells were also wider than those observed  
351 during GroESL depletion in the absence of additional FtsA (Figure 6F). As cell thickening is  
352 associated with defects in PG biosynthesis, we hypothesize that in the event of restoring  
353 sufficient FtsA, PG instability is the dominant phenotype that emerges due to GroESL depletion.

354         To evaluate the impact of providing extra FtsA on the function of FtsZ during early  
355 GroESL depletion (Figure 5C), we again used HADA staining. A delay in Z-ring stalling was  
356 observed (Figure 6G), where the proportion of newly divided cells without a midcell focus of PG  
357 incorporation was maintained for an additional 2 hours, or at least one additional population  
358 doubling (Figure 6G vs. Figure 5C), during which growth rate was maintained. Collectively  
359 these experiments illustrate that GroESL is necessary to support normal Z-ring function during  
360 division, and while GroESL insufficiency results in solubility changes for Fz1A and FtsA, it is  
361 FtsA function that is most sensitive to the folding capacity of the chaperonin. Furthermore, our  
362 data demonstrate that the interaction between FtsE and GroESL, required for division in *E. coli*,  
363 is not conserved in *C. crescentus*, which instead tunes cell division to chaperone availability  
364 through an actin protein-chaperonin interaction.

365

366 **Discussion**

367 Chaperonins are highly conserved folding machines that provide essential protein folding  
368 across all kingdoms of life. Critical functions of chaperonins range from helping bacteria to build  
369 peptidoglycan (47) to supporting chloroplast and mitochondrial function in eukaryotes (60, 61),  
370 and information from prokaryotic systems has helped to inform exploration of human  
371 chaperonins (62). In this present work we expand on how chaperonin function is integrated into  
372 bacterial physiology by exploring GroESL function in the alphaproteobacterium *Caulobacter*  
373 *crenscentus*. We find that the integration of GroESL into the processes of cell division and  
374 synthesis of the cell envelope is conserved amongst different groups of bacteria, however this  
375 integration occurs via distinct points of interaction (Figure 7). In *C. crenscentus*, GroESL folding  
376 is required to support PG biosynthesis via MurG, MurA, and DapA, but is most critically  
377 required to support cell division through an interaction with FtsA. By linking a chaperonin to  
378 these processes, stress-responsive protein folding capacity is intimately connected to both cell  
379 envelope synthesis and cell division in *Caulobacter*.

380 Our study has shown that chaperonin folding is indispensable for PG synthesis in *C.*  
381 *crenscentus*, and has identified several new interactions between PG biosynthetic proteins and  
382 GroESL. This is the first description of MurA being linked to GroESL folding, though an  
383 interaction with DnaKJE has previously been established (53). Our data suggests that MurG  
384 solubility and localization may also respond to GroESL-mediated folding (Figure 4A). MurG has  
385 been shown to act as a scaffold for PG biosynthesis in *Bordetella pertussis* and *Thermotoga*  
386 *maritima* (63, 64) and could provide a similar function in *C. crenscentus*, though it remains  
387 unclear if the changes we observe for MurG are due to absence of a direct interaction with  
388 GroESL, or perhaps loss of an upstream signal required for PG biosynthetic subcomplex  
389 assembly. Depletion of PG precursors, which may occur through a reduction in pathway protein

390 function, results in filamentation to conserve limited resources and prevent over-investment in  
391 the intensive process of building new cell poles (51). During periods of proteotoxic stress and  
392 high refolding demand, titration of the chaperonin away from synthetic processes could provide a  
393 way to postpone cell division and focus on survival. Interaction of both DnaKJE and GroESL  
394 with unfolded proteins is known to regulate the heat shock response to this end (5), and DnaKJE  
395 availability during stress is integrated into the cell cycle as an indirect regulator of DNA  
396 replication initiation (31). It remains to be discovered how PG synthetic protein folding and  
397 abundance are prioritized during stress. Newly discovered accessory factors, such as the holdase  
398 CnoX (65), may hold the key to how client proteins are presented to GroESL, and which  
399 processes are protected during high unfolding demand. Discerning these interactions will be  
400 important to understanding how organisms balance growth and division when surviving stress.

401 Our study has identified the bacterial actin homologue FtsA as a protein that is  
402 particularly sensitive to GroESL availability. FtsA was among the proteins that showed increased  
403 insolubility in the absence of GroESL (Figure 3A), and although its enrichment in the insoluble  
404 fraction was mild, producing extra FtsA alone was able to delay the development of  
405 filamentation as chaperonin levels declined (Figure 6D), to a greater extent than other  
406 interventions (Figure 4E). Work in *E. coli* has shown that increasing the expression of other  
407 GroESL client proteins (or those that feed into the client protein function) can also temporarily  
408 compensate for reduced levels of GroESL during depletion (14, 21), by providing a reserve pool  
409 of folded client protein to draw on. Our data linking FtsA function with GroESL is particularly  
410 striking, as a major role of the eukaryotic chaperonin TRiC is to perform folding of eukaryotic  
411 actin (66, 67), yet bacterial FtsA has not been identified previously as an interactor of GroESL or  
412 DnaKJE (19, 53). Therefore, our findings raise questions on the conservation of the relationship

413 between actin proteins and chaperonins. As FtsA is also a highly conserved and crucial protein in  
414 diverse bacteria, it will be important to determine the relationship between actin homologues and  
415 GroESL in other organisms, including clarifying this relationship in *E. coli*. Our work has  
416 excluded a role for the *E. coli* obligate GroESL client protein FtsE in *C. crescentus* (19, 21),  
417 suggesting that different organisms have evolved separate links between GroESL and cell  
418 division. As GroESL is thought to support evolutionary plasticity in metabolic enzymes (68), it is  
419 an open question if the chaperonin might permit similar flexibility in cell division proteins, a  
420 question with consequences for resistance to current and future antimicrobials that target the cell  
421 envelope and cell division.  
422

## 423 **Materials and Methods**

### 424 *Strains and plasmids*

425 The strains and plasmids used in this study are listed in Supplemental Table 3.

426

### 427 *Bacterial growth conditions*

428 All *C. crescentus* strains were routinely cultured at 30°C, unless otherwise indicated, in  
429 liquid PYE media while shaking at 200 rpm. If necessary, the following media supplements were  
430 added to the following final concentrations: 0.3% xylose, 0.2% glucose, 25µg/ml spectinomycin,  
431 5µg/ml kanamycin, 0.625µg/ml gentamycin, 500mM vanillate. Cultures were regularly diluted to  
432 keep them in mid-log phase. In GroESL depletion experiments, cells were washed three times  
433 with PYE free of media supplements by centrifugation (6000 *xg*, 4 min) before resuspension in  
434 medium lacking xylose inducer. Growth on solid PYE media was performed in the presence of  
435 the following supplement concentrations: 0.3% xylose, 0.2% glucose, 500mM vanillate, 5µg/ml  
436 gentamycin, 25µg/ml kanamycin, 400µg/ml spectinomycin. Transductions were performed using  
437 ϕCr30 as described previously (69). *E. coli* was grown for cloning purposes in LB supplemented  
438 with antibiotics as necessary at 37°C.

439

### 440 *Spot assays*

441 Spot assays were performed with cultures maintained in log phase for three hours and  
442 diluted to an OD<sub>600</sub> of ~0.2. Tenfold serial dilutions of this culture were prepared and 2µL of  
443 each dilution was spotted and dried onto a fresh agar plate.

444

### 445 *Growth curves*

446 For growth curve experiments, cultures maintained in log phase for 3 hours were diluted  
447 to an OD<sub>600</sub> of ~0.05 and 200 $\mu$ L diluted culture was added to 96-well plates. Measurement was  
448 performed every ten minutes at 30°C with culture aeration in a Tecan Spark for 24h. Three  
449 biological replicates were performed for all growth curve measurements, with three technical  
450 replicates for each sample.

451

#### 452 *Western blotting*

453 Cell pellets were harvested by centrifugation and resuspended in Laemmli buffer  
454 normalized to OD<sub>600</sub> measurement, followed by heating at 70°C for 10min. Protein extracts were  
455 loaded on 4-20% stain-free SDS-PAGE gels and subjected to electrophoresis before activation  
456 and transfer to a nitrocellulose membrane. Successful transfer and equal loading were verified by  
457 2,2,2-trichloroethanol visualization prior to blotting. Specific proteins were detected using the  
458 following primary antibody dilutions: anti-CtrA; 1:5,000 (kindly provided by MT Laub), anti-  
459 GcrA; 1:4,000 (70), anti-CcrM; 1:5,000 (71), anti-DnaA; 1:5,000 (72), anti-SciP; 1:2,000 (33),  
460 anti-Lon; 1:10,000 (kind gift from RT Sauer), anti-GroEL; 1:10,000 (8), and the commercially  
461 available anti-M2 1:1,000 (Sigma). HRP-conjugated secondary antibody raised against rabbit or  
462 mouse was used at a 1:5,000 dilution, and SuperSignal Femto West reagent was used for signal  
463 detection using a Licor Odyssey. Images were processed and quantified using Fiji.

464

#### 465 *Microscopy and image analysis*

466 For cell length analysis, samples were fixed in 1% formaldehyde and spotted on 1%  
467 agarose pads. A final concentration of 2 $\mu$ g/ml Hoechst 33258 was used to stain fixed cells by  
468 incubating 25 minutes in the dark prior to mounting. HADA staining was performed on ethanol-

469 fixed cells as in (73). For live cell imaging, including all instances of fluorescent protein  
470 imaging, the microscope housing was heated to 30°C and live cells were spotted on 1% agar  
471 PYE pads containing xylose, glucose, or vanillate as necessary.

472 Imaging was performed on a Nikon Ti-Eclipse microscope equipped with a 100X  
473 objective and Zyla 4.2 Plus camera, and at least ten independent frames of each sample were  
474 collected using Nikon Image Elements AR software. Image stacks were imported into Fiji and  
475 background of fluorescent images was subtracted prior to segmentation using MicrobeJ (74). In  
476 all images, segmentation was manually checked prior to exporting data. Unless otherwise  
477 indicated, ANOVA analysis (including adjustment for multiple comparisons where necessary)  
478 was performed to derive statistical significance of morphological changes using GraphPad Prism  
479 8 software.

480

#### 481 *Flow cytometry*

482 Samples of *C. crescentus* cultures grown as indicated were fixed in a final concentration  
483 of 70% ethanol. Cells were pelleted and washed in 50mM sodium citrate buffer containing  
484 2µg/ml RNase, and incubated overnight at 50°C. A final concentration of 2.5µg/ml SYTOX  
485 green was used to stain 1:10 dilutions of the RNA-digested samples immediately prior to  
486 processing by a BD Biosciences LSR-Fortessa flow cytometer. Data were analysed and  
487 histograms prepared with FlowJo.

488

#### 489 *Subcellular fractionation*

490 Isolation of the detergent-resistant insoluble fraction was adapted from (39), as follows.  
491 Log phase cultures were harvested at the indicated time points or conditions and pelleted at

492 7000xg for 10min at 4°C. Cells were washed once in buffer I (50mM Tris-HCl pH 8.0, 150mM  
493 NaCl) and frozen at -80°C. Pellets were resuspended in buffer I supplemented with 12 U/ml  
494 benzonase and disrupted by sonication (10 cycles of 30s on, 30s off at 50% amplitude in a  
495 QSonica sonicator). Cellular debris was removed from the lysate by centrifugation at 5000xg for  
496 10min at 4°C and removing supernatant, and repeating this step. Protein concentration of lysate  
497 was determined by Nanodrop. To separate soluble and insoluble fractions, lysate was centrifuged  
498 at 20,000xg for 20min at 4°C. The insoluble fraction was washed in buffer I, resuspended by one  
499 cycle of sonication, and pelleted again, followed by incubation with 1% Triton X-100 for 1h with  
500 regular vortexing. The insoluble fraction was pelleted again and washed an additional two times  
501 before resuspension in Laemmli buffer. Dilution in Laemmli buffer was normalized according to  
502 lysate protein concentration, with insoluble fractions were concentrated 20X to account for the  
503 lower relative abundance of this fraction. Membrane fractions were prepared separately as in  
504 (75).

505

#### 506 *RNA sequencing*

507 RNA of bacterial cultures was extracted using the RNeasy mini kit (Qiagen), and RNA  
508 sequencing performed by GENEWIZ (South Plainfield, NJ). Gene expression data are available  
509 at the Gene Expression Omnibus repository: GSE162320.

510

#### 511 *Mass spectrometry*

512 The insoluble, detergent resistant fraction of cultures was harvested and prepared in  
513 biological duplicates according to the protocol described above. Protein digestion, TMT10plex  
514 isobaric labelling and mass spectrometry were performed at the Clinical Proteomics Mass



515 Spectrometry facility (Karolinska Institute, Karolinska University Hospital, Science for Life  
516 Laboratory). To determine differential abundance in the insoluble fractions, linear model  
517 analysis was performed as in (76). Only significantly changed protein abundances ( $p > 0.05$ )  
518 were considered for further analysis as described in the text. For analysis of SCOP folds, fold  
519 identity was predicted from amino acid sequence using the SUPERFAMILY 2 database (77, 78).  
520

521 **Acknowledgements**

522 We thank Dr. Suely Gomes for providing the SG300 strain and GroEL antibody, Dr. Erin Goley  
523 for the kind gifts of strains, plasmids, FzIA antibody, and helpful discussions, and Dr. Patrick  
524 Viollier for providing CcrM and GcrA antibodies. We also thank the Clinical Proteomics Mass  
525 Spectrometry facility and National Bioinformatics Infrastructure Sweden (NBIS, SciLifeLab) for  
526 assistance with collecting and analysing the proteomics data as well as members of the Jonas  
527 group for suggestions and comments. The study was financially supported by the Swedish  
528 Foundation for Strategic Research (FFL15-0005), the Swedish Research Council (2016-03300),  
529 and funding from the Strategic Research Area (SFO) program distributed through Stockholm  
530 University.

531 **References**

- 532 1. Balchin D, Hayer-Hartl M, Hartl FU. 2020. Recent advances in understanding catalysis of  
533 protein folding by molecular chaperones. *FEBS Lett* 594:2770–2781.
- 534 2. Anfinsen CB, Scheraga HA. 1975. Experimental and theoretical aspects of protein folding.  
535 *Adv Protein Chem* 29:205–300.
- 536 3. Dahl J-U, Gray MJ, Jakob U. 2015. Protein quality control under oxidative stress  
537 conditions. *J Mol Biol* 427:1549–1563.
- 538 4. Tamás MJ, Fauvet B, Christen P, Goloubinoff P. 2018. Misfolding and aggregation of  
539 nascent proteins: a novel mode of toxic cadmium action in vivo. *Curr Genet* 64:177–181.
- 540 5. Roncarati D, Scarlato V. 2017. Regulation of heat-shock genes in bacteria: from signal  
541 sensing to gene expression output. *FEMS Microbiol Rev* 41:549–574.
- 542 6. Schramm FD, Schroeder K, Jonas K. 2020. Protein aggregation in bacteria. *FEMS*  
543 *Microbiol Rev* 44:54–72.
- 544 7. Hayer-Hartl M, Bracher A, Hartl FU. 2016. The GroEL-GroES Chaperonin Machine: A  
545 Nano-Cage for Protein Folding. *Trends Biochem Sci* 41:62–76.
- 546 8. Baldini RL, Avedissian M, Gomes SL. 1998. The CIRCE element and its putative repressor  
547 control cell cycle expression of the *Caulobacter crescentus* groESL operon. *J Bacteriol*  
548 180:1632–1641.
- 549 9. Lund PA. 2009. Multiple chaperonins in bacteria – why so many? *FEMS Microbiol Rev*  
550 33:785–800.

- 551 10. Glass JI, Lefkowitz EJ, Glass JS, Heiner CR, Chen EY, Cassell GH. 2000. The complete  
552 sequence of the mucosal pathogen *Ureaplasma urealyticum*. *Nature* 407:757–762.
- 553 11. Chowdhury N, Kingston JJ, Whitaker WB, Carpenter MR, Cohen A, Boyd EF. 2014.  
554 Sequence and expression divergence of an ancient duplication of the chaperonin groESEL  
555 operon in *Vibrio* species. *Microbiology* 160:1953–1963.
- 556 12. Da Silva ACA, Simão RCG, Susin MF, Baldini RL, Avedissian M, Gomes SL. 2003.  
557 Downregulation of the heat shock response is independent of DnaK and  $\sigma^{32}$  levels in  
558 *Caulobacter crescentus*: Heat shock response regulation in *Caulobacter*. *Mol Microbiol*  
559 49:541–553.
- 560 13. Lemos JA, Luzardo Y, Burne RA. 2007. Physiologic effects of forced down-regulation of  
561 dnaK and groEL expression in *Streptococcus mutans*. *J Bacteriol* 189:1582–1588.
- 562 14. Masters M, Blakely G, Coulson A, McLennan N, Yerko V, Acord J. 2009. Protein folding  
563 in *Escherichia coli*: the chaperonin GroE and its substrates. *Res Microbiol* 160:267–277.
- 564 15. Susin MF, Baldini RL, Gueiros-Filho F, Gomes SL. 2006. GroES/GroEL and DnaK/DnaJ  
565 have distinct roles in stress responses and during cell cycle progression in *Caulobacter*  
566 *crescentus*. *J Bacteriol* 188:8044–8053.
- 567 16. Egan AJF, Errington J, Vollmer W. 2020. Regulation of peptidoglycan synthesis and  
568 remodelling. *Nat Rev Microbiol* <https://doi.org/10.1038/s41579-020-0366-3>.
- 569 17. Haeusser DP, Margolin W. 2016. Splitsville: structural and functional insights into the  
570 dynamic bacterial Z ring. *Nat Rev Microbiol* 14:305–319.

- 571 18. Fujiwara K, Ishihama Y, Nakahigashi K, Soga T, Taguchi H. 2010. A systematic survey of  
572 in vivo obligate chaperonin-dependent substrates. *EMBO J* 29:1552–1564.
- 573 19. Kerner MJ, Naylor DJ, Ishihama Y, Maier T, Chang H-C, Stines AP, Georgopoulos C,  
574 Frishman D, Hayer-Hartl M, Mann M, Hartl FU. 2005. Proteome-wide analysis of  
575 chaperonin-dependent protein folding in *Escherichia coli*. *Cell* 122:209–220.
- 576 20. Niwa T, Fujiwara K, Taguchi H. 2016. Identification of novel in vivo obligate GroEL/ES  
577 substrates based on data from a cell-free proteomics approach. *FEBS Lett* 590:251–257.
- 578 21. Fujiwara K, Taguchi H. 2007. Filamentous morphology in GroE-depleted *Escherichia coli*  
579 induced by impaired folding of FtsE. *J Bacteriol* 189:5860–5866.
- 580 22. Govezensky D, Greener T, Segal G, Zamir A. 1991. Involvement of GroEL in *nif* gene  
581 regulation and nitrogenase assembly. *J Bacteriol* 173:6339–6346.
- 582 23. Ogawa J, Long SR. 1995. The *Rhizobium meliloti* groELc locus is required for regulation  
583 of early nod genes by the transcription activator NodD. *Genes Dev* 9:714–729.
- 584 24. Ojha A, Anand M, Bhatt A, Kremer L, Jacobs WR, Hatfull GF. 2005. GroEL1: a dedicated  
585 chaperone involved in mycolic acid biosynthesis during biofilm formation in mycobacteria.  
586 *Cell* 123:861–873.
- 587 25. Curtis PD, Brun YV. 2010. Getting in the loop: regulation of development in *Caulobacter*  
588 *crescentus*. *Microbiol Mol Biol Rev* MMBR 74:13–41.
- 589 26. Goley ED, Yeh Y-C, Hong S-H, Fero MJ, Abeliuk E, McAdams HH, Shapiro L. 2011.  
590 Assembly of the *Caulobacter* cell division machine. *Mol Microbiol* 80:1680–1698.

- 591 27. Zielińska A, Billini M, Möll A, Kremer K, Briegel A, Izquierdo Martinez A, Jensen GJ,  
592 Thanbichler M. 2017. LytM factors affect the recruitment of autolysins to the cell division  
593 site in *Caulobacter crescentus*: The autolytic machinery of *C. crescentus*. *Mol Microbiol*  
594 106:419–438.
- 595 28. Heinrich K, Sobetzko P, Jonas K. 2016. A Kinase-Phosphatase Switch Transduces  
596 Environmental Information into a Bacterial Cell Cycle Circuit. *PLoS Genet* 12:e1006522.
- 597 29. Ward D, Newton A. 1997. Requirement of topoisomerase IV parC and parE genes for cell  
598 cycle progression and developmental regulation in *Caulobacter crescentus*. *Mol Microbiol*  
599 26:897–910.
- 600 30. Jonas K. 2014. To divide or not to divide: control of the bacterial cell cycle by  
601 environmental cues. *Curr Opin Microbiol* 18:54–60.
- 602 31. Jonas K, Liu J, Chien P, Laub MT. 2013. Proteotoxic stress induces a cell-cycle arrest by  
603 stimulating Lon to degrade the replication initiator DnaA. *Cell* 154:623–636.
- 604 32. Gonzalez D, Kozdon JB, McAdams HH, Shapiro L, Collier J. 2014. The functions of DNA  
605 methylation by CcrM in *Caulobacter crescentus*: a global approach. *Nucleic Acids Res*  
606 42:3720–3735.
- 607 33. Gora KG, Tsokos CG, Chen YE, Srinivasan BS, Perchuk BS, Laub MT. 2010. A cell-type-  
608 specific protein-protein interaction modulates transcriptional activity of a master regulator  
609 in *Caulobacter crescentus*. *Mol Cell* 39:455–467.

- 610 34. Haakonsen DL, Yuan AH, Laub MT. 2015. The bacterial cell cycle regulator GcrA is a  $\sigma^{70}$   
611 cofactor that drives gene expression from a subset of methylated promoters. *Genes Dev*  
612 29:2272–2286.
- 613 35. Hottes AK, Shapiro L, McAdams HH. 2005. DnaA coordinates replication initiation and  
614 cell cycle transcription in *Caulobacter crescentus*. *Mol Microbiol* 58:1340–1353.
- 615 36. Laub MT, Chen SL, Shapiro L, McAdams HH. 2002. Genes directly controlled by CtrA, a  
616 master regulator of the *Caulobacter* cell cycle. *Proc Natl Acad Sci U S A* 99:4632–4637.
- 617 37. Azia A, Unger R, Horovitz A. 2012. What distinguishes GroEL substrates from other  
618 *Escherichia coli* proteins?: GroEL substrates. *FEBS J* 279:543–550.
- 619 38. Niwa T, Ying B-W, Saito K, Jin W, Takada S, Ueda T, Taguchi H. 2009. Bimodal protein  
620 solubility distribution revealed by an aggregation analysis of the entire ensemble of  
621 *Escherichia coli* proteins. *Proc Natl Acad Sci U S A* 106:4201–4206.
- 622 39. Schramm FD, Schroeder K, Alvelid J, Testa I, Jonas K. 2019. Growth-driven displacement  
623 of protein aggregates along the cell length ensures partitioning to both daughter cells in  
624 *Caulobacter crescentus*. *Mol Microbiol* 111:1430–1448.
- 625 40. Beaufay F, Coppine J, Mayard A, Laloux G, De Bolle X, Hallez R. 2015. A NAD-  
626 dependent glutamate dehydrogenase coordinates metabolism with cell division in  
627 *Caulobacter crescentus*. *EMBO J* 34:1786–1800.

- 628 41. Radhakrishnan SK, Pritchard S, Viollier PH. 2010. Coupling prokaryotic cell fate and  
629 division control with a bifunctional and oscillating oxidoreductase homolog. *Dev Cell*  
630 18:90–101.
- 631 42. Barrows JM, Sundararajan K, Bhargava A, Goley ED. 2020. FtsA Regulates Z-Ring  
632 Morphology and Cell Wall Metabolism in an FtsZ C-Terminal Linker-Dependent Manner  
633 in *Caulobacter crescentus*. *J Bacteriol* 202.
- 634 43. Din N, Quardokus EM, Sackett MJ, Brun YV. 1998. Dominant C-terminal deletions of FtsZ  
635 that affect its ability to localize in *Caulobacter* and its interaction with FtsA. *Mol Microbiol*  
636 27:1051–1063.
- 637 44. Goley ED, Dye NA, Werner JN, Gitai Z, Shapiro L. 2010. Imaging-Based Identification of  
638 a Critical Regulator of FtsZ Protofilament Curvature in *Caulobacter*. *Mol Cell* 39:975–987.
- 639 45. Aaron M, Charbon G, Lam H, Schwarz H, Vollmer W, Jacobs-Wagner C. 2007. The  
640 tubulin homologue FtsZ contributes to cell elongation by guiding cell wall precursor  
641 synthesis in *Caulobacter crescentus*. *Mol Microbiol* 64:938–952.
- 642 46. Barreteau H, Kovač A, Boniface A, Sova M, Gobec S, Blanot D. 2008. Cytoplasmic steps  
643 of peptidoglycan biosynthesis. *FEMS Microbiol Rev* 32:168–207.
- 644 47. McLennan N, Masters M. 1998. GroE is vital for cell-wall synthesis. *Nature* 392:139.
- 645 48. White CL, Kitich A, Gober JW. 2010. Positioning cell wall synthetic complexes by the  
646 bacterial morphogenetic proteins MreB and MreD: Control of cell shape in bacteria. *Mol*  
647 *Microbiol* 76:616–633.



- 648 49. Williams B, Bhat N, Chien P, Shapiro L. 2014. ClpXP and ClpAP proteolytic activity on  
649 divisome substrates is differentially regulated following the *Caulobacter* asymmetric cell  
650 division. *Mol Microbiol* 93:853–866.
- 651 50. Thanbichler M, Shapiro L. 2006. MipZ, a spatial regulator coordinating chromosome  
652 segregation with cell division in *Caulobacter*. *Cell* 126:147–162.
- 653 51. Harris LK, Theriot JA. 2016. Relative Rates of Surface and Volume Synthesis Set Bacterial  
654 Cell Size. *Cell* 165:1479–1492.
- 655 52. Kahan FM, Kahan JS, Cassidy PJ, Kropp H. 1974. The mechanism of action of fosfomycin  
656 (phosphonomycin). *Ann N Y Acad Sci* 235:364–386.
- 657 53. Calloni G, Chen T, Schermann SM, Chang H-C, Genevoux P, Agostini F, Tartaglia GG,  
658 Hayer-Hartl M, Hartl FU. 2012. DnaK functions as a central hub in the *E. coli* chaperone  
659 network. *Cell Rep* 1:251–264.
- 660 54. Lariviere PJ, Mahone CR, Santiago-Collazo G, Howell M, Daitch AK, Zeinert R, Chien P,  
661 Brown PJB, Goley ED. 2019. An Essential Regulator of Bacterial Division Links FtsZ to  
662 Cell Wall Synthase Activation. *Curr Biol* 29:1460-1470.e4.
- 663 55. Pichoff S, Lutkenhaus J. 2005. Tethering the Z ring to the membrane through a conserved  
664 membrane targeting sequence in FtsA: Membrane tethering of Z ring by FtsA. *Mol*  
665 *Microbiol* 55:1722–1734.

- 666 56. Kuru E, Hughes HV, Brown PJ, Hall E, Tekkam S, Cava F, de Pedro MA, Brun YV,  
667 VanNieuwenhze MS. 2012. In Situ probing of newly synthesized peptidoglycan in live  
668 bacteria with fluorescent D-amino acids. *Angew Chem Int Ed Engl* 51:12519–12523.
- 669 57. Meier EL, Daitch AK, Yao Q, Bhargava A, Jensen GJ, Goley ED. 2017. FtsEX-mediated  
670 regulation of the final stages of cell division reveals morphogenetic plasticity in  
671 *Caulobacter crescentus*. *PLOS Genet* 13:e1006999.
- 672 58. Martin ME, Trimble MJ, Brun YV. 2004. Cell cycle-dependent abundance, stability and  
673 localization of FtsA and FtsQ in *Caulobacter crescentus*: FtsA and FtsQ cell cycle  
674 regulation in *C. crescentus*. *Mol Microbiol* 54:60–74.
- 675 59. Sackett MJ, Kelly AJ, Brun YV. 1998. Ordered expression of ftsQA and ftsZ during the  
676 *Caulobacter crescentus* cell cycle. *Mol Microbiol* 28:421–434.
- 677 60. Christensen JH, Nielsen MN, Hansen J, Füchtbauer A, Füchtbauer E-M, West M, Corydon  
678 TJ, Gregersen N, Bross P. 2010. Inactivation of the hereditary spastic paraplegia-associated  
679 Hspd1 gene encoding the Hsp60 chaperone results in early embryonic lethality in mice.  
680 *Cell Stress Chaperones* 15:851–863.
- 681 61. Zhao Q, Liu C. 2017. Chloroplast Chaperonin: An Intricate Protein Folding Machine for  
682 Photosynthesis. *Front Mol Biosci* 4:98.
- 683 62. Conway de Macario E, Robb FT, Macario AJL. 2016. Prokaryotic Chaperonins as  
684 Experimental Models for Elucidating Structure-Function Abnormalities of Human  
685 Pathogenic Mutant Counterparts. *Front Mol Biosci* 3:84.

- 686 63. Favini-Stabile S, Contreras-Martel C, Thielens N, Dessen A. 2013. MreB and MurG as  
687 scaffolds for the cytoplasmic steps of peptidoglycan biosynthesis: Mur ligases interact with  
688 MreB and MurG. *Environ Microbiol* 15:3218–3228.
- 689 64. Laddomada F, Miyachiro MM, Jessop M, Patin D, Job V, Mengin-Lecreulx D, Le Roy A,  
690 Ebel C, Breyton C, Gutsche I, Dessen A. 2019. The MurG glycosyltransferase provides an  
691 oligomeric scaffold for the cytoplasmic steps of peptidoglycan biosynthesis in the human  
692 pathogen *Bordetella pertussis*. *Sci Rep* 9.
- 693 65. Goemans CV, Beaufay F, Arts IS, Agrebi R, Vertommen D, Collet J-F. 2018. The  
694 Chaperone and Redox Properties of CnoX Chaperedoxins Are Tailored to the Proteostatic  
695 Needs of Bacterial Species. *mBio* 9.
- 696 66. Balchin D, Miličić G, Strauss M, Hayer-Hartl M, Hartl FU. 2018. Pathway of Actin Folding  
697 Directed by the Eukaryotic Chaperonin TRiC. *Cell* 174:1507-1521.e16.
- 698 67. Gao Y, Thomas JO, Chow RL, Lee G-H, Cowan NJ. 1992. A cytoplasmic chaperonin that  
699 catalyzes  $\beta$ -actin folding. *Cell* 69:1043–1050.
- 700 68. Takemoto K, Niwa T, Taguchi H. 2011. Difference in the distribution pattern of substrate  
701 enzymes in the metabolic network of *Escherichia coli*, according to chaperonin  
702 requirement. *BMC Syst Biol* 5:98.
- 703 69. Ely B. 1991. Genetics of *Caulobacter crescentus*. *Methods Enzymol* 204:372–384.

- 704 70. Holtzendorff J, Hung D, Brende P, Reisenauer A, Viollier PH, McAdams HH, Shapiro L.  
705 2004. Oscillating global regulators control the genetic circuit driving a bacterial cell cycle.  
706 Science 304:983–987.
- 707 71. Stephens C, Reisenauer A, Wright R, Shapiro L. 1996. A cell cycle-regulated bacterial  
708 DNA methyltransferase is essential for viability. Proc Natl Acad Sci 93:1210–1214.
- 709 72. Jonas K, Chen YE, Laub MT. 2011. Modularity of the Bacterial Cell Cycle Enables  
710 Independent Spatial and Temporal Control of DNA Replication. Curr Biol 21:1092–1101.
- 711 73. Kuru E, Tekkam S, Hall E, Brun YV, Van Nieuwenhze MS. 2015. Synthesis of fluorescent  
712 D-amino acids and their use for probing peptidoglycan synthesis and bacterial growth in  
713 situ. Nat Protoc 10:33–52.
- 714 74. Ducret A, Quardokus EM, Brun YV. 2016. MicrobeJ, a tool for high throughput bacterial  
715 cell detection and quantitative analysis. Nat Microbiol 1:16077.
- 716 75. Anwari K. 2012. Isolate and Sub-fractionate Cell Membranes from *Caulobacter crescentus*.  
717 BIO-Protoc 2.
- 718 76. Zhu Y, Orre LM, Zhou Tran Y, Mermelekas G, Johansson HJ, Malyutina A, Anders S,  
719 Lehtiö J. 2020. DEqMS: A Method for Accurate Variance Estimation in Differential  
720 Protein Expression Analysis. Mol Cell Proteomics 19:1047–1057.
- 721 77. Gough J, Karplus K, Hughey R, Chothia C. 2001. Assignment of homology to genome  
722 sequences using a library of hidden Markov models that represent all proteins of known  
723 structure. J Mol Biol 313:903–919.

724 78. Pandurangan AP, Stahlhacke J, Oates ME, Smithers B, Gough J. 2019. The  
725 SUPERFAMILY 2.0 database: a significant proteome update and a new webserver. *Nucleic*  
726 *Acids Res* 47:D490–D494.

727

728 **Figures**

**Figure 1**

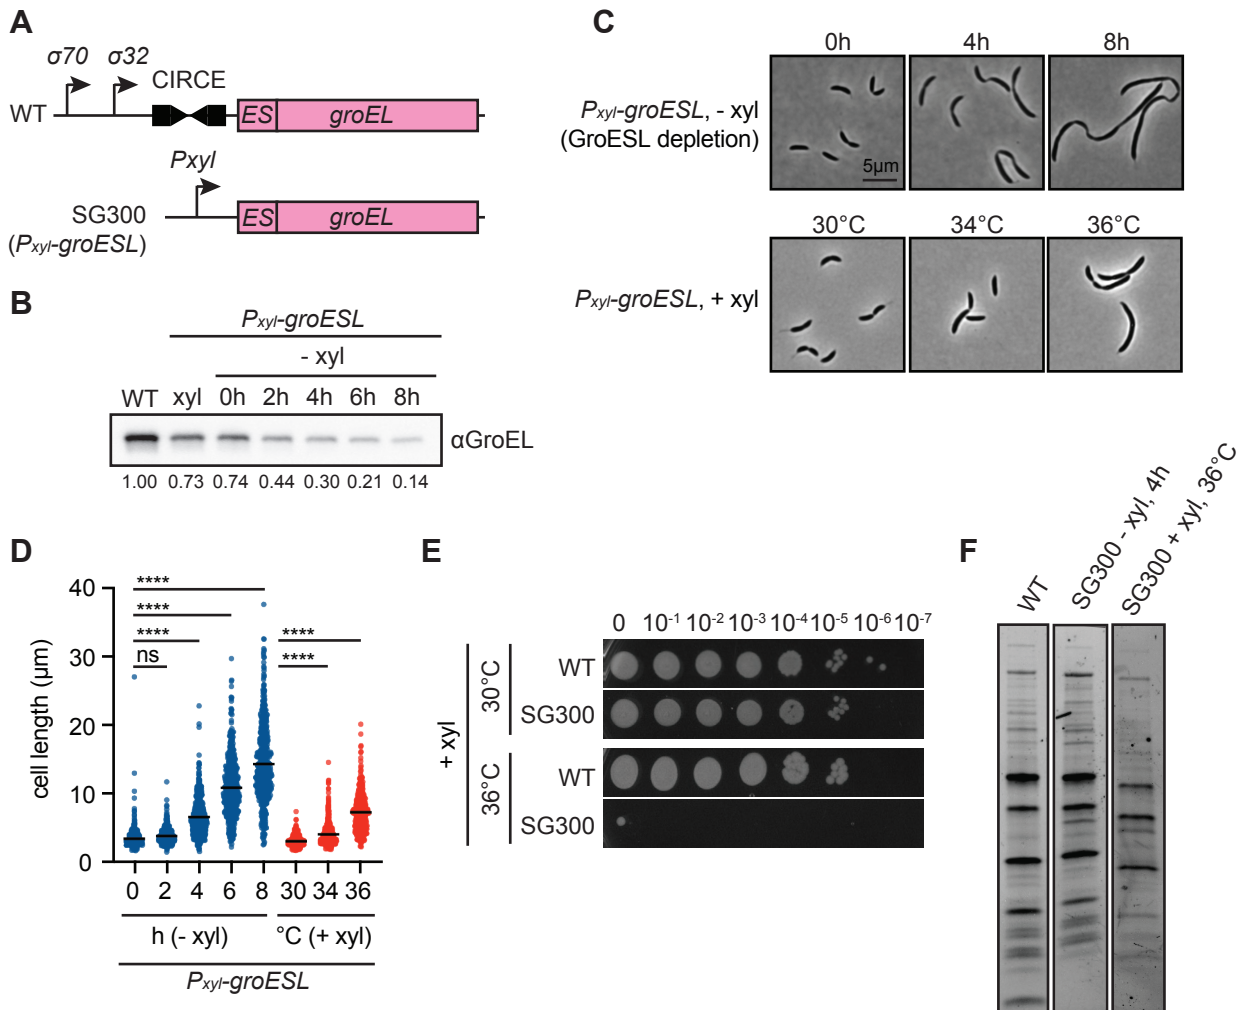

729

730 **Figure 1: GroESL folding insufficiency results in cell filamentation.**

731 (A) Diagram of GroESL locus in wild type (WT) and GroESL depletion (SG300, *P<sub>xyI</sub>-groESL*)  
732 strains. Wild type GroESL is regulated by the CIRCE element as well as a sigma 32-dependent  
733 promoter, which has been replaced by the xylose-inducible promoter in strain SG300 (12).

734 (B) Western blot of protein levels of GroESL during depletion (-xyl). Quantifications of band  
735 intensities are an average of three biological replicates.

736 (C) Phase contrast microscopy showing the morphology of the GroESL depletion strain (*P<sub>xyI</sub>-*  
737 *groESL*) when grown in depleting conditions (-xyl), in non-depleting conditions (+xyl), and at  
738 increased temperature. Cultures were depleted for the indicated time, or incubated for four hours  
739 at the indicated temperatures prior to fixation and imaging.

740 (D) Quantification of population cell lengths of the GroESL depletion strain (*P<sub>xyI</sub>-groESL*) during  
741 depletion (-xyl) or when grown under non-depleting conditions (+xyl) at the indicated  
742 temperatures for four hours (n < 417 each population; \*\*\*\*, p < 0.0001).

743 (E) Spot assay of wild type (WT) and the GroESL depletion strain (SG300), when grown in non-  
744 depleting conditions, incubated at the indicated growth temperatures. Xylose was included in all  
745 agar plates; plates were incubated for 2-3 days prior to imaging.

746 (F) Coomassie staining of SDS-PAGE gel of insoluble fractions isolated from wild type and the  
747 GroESL depletion strain (SG300), grown either for four hours in depleting conditions (-xyl), or  
748 incubated at 36C for four hours in non-depleting conditions (+ xyl).

**Figure 2**

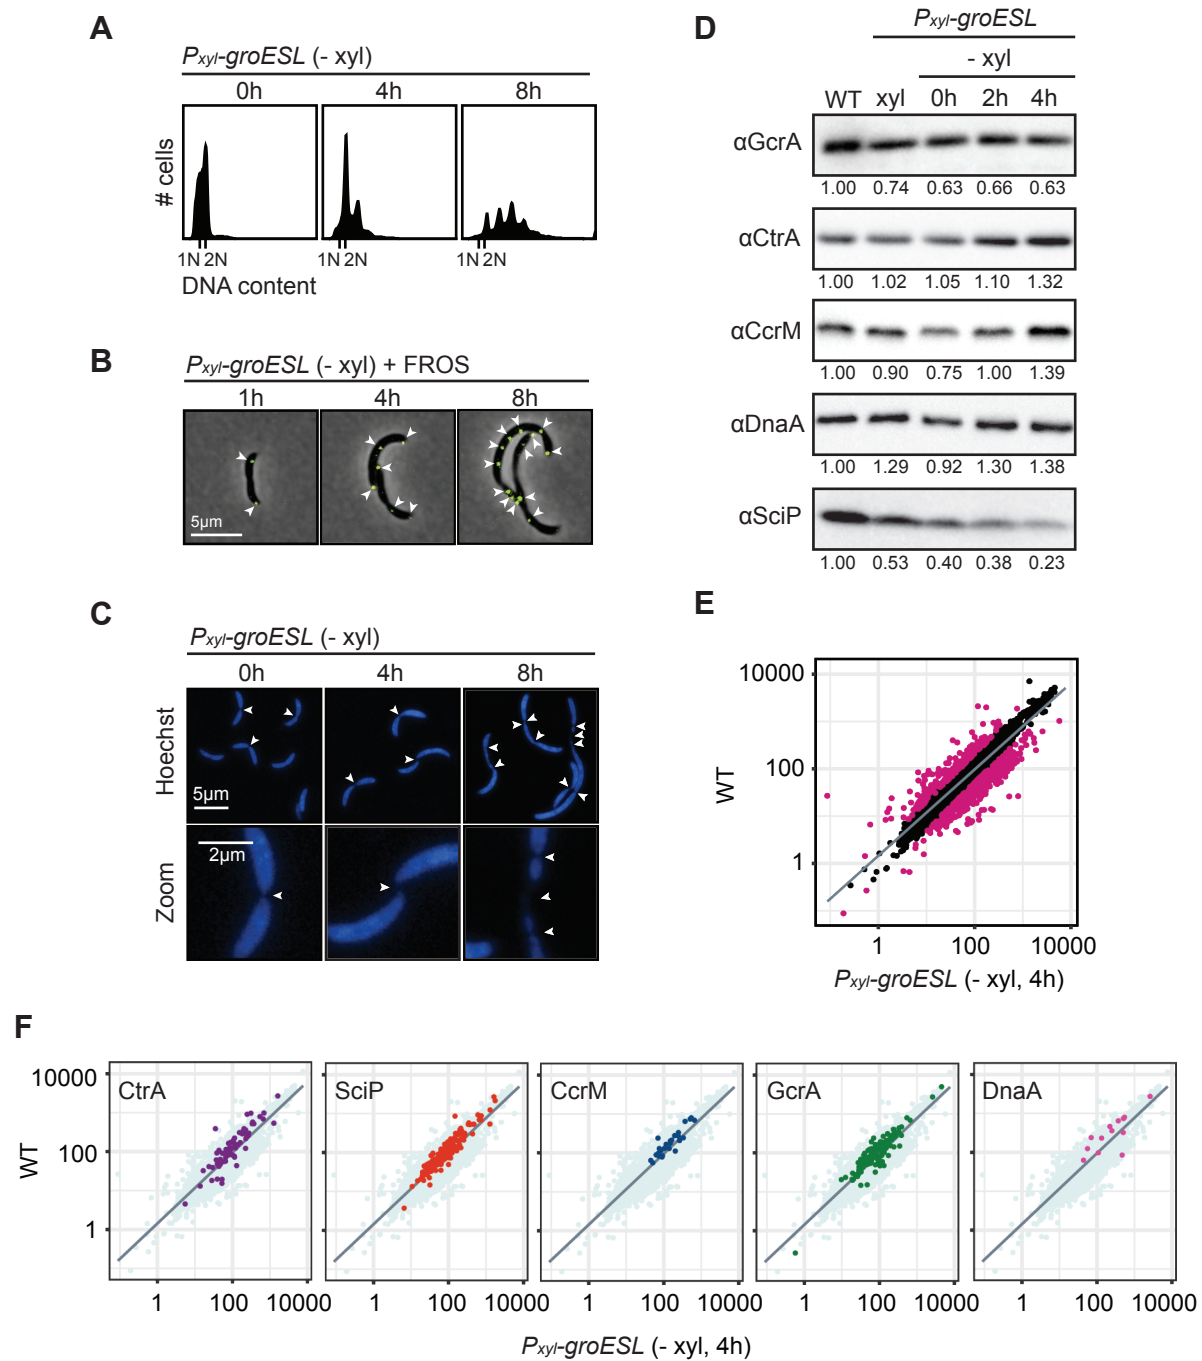



750 **Figure 2: Chromosome replication and cell cycle transcription continue during GroESL**  
751 **insufficiency.**

752 (A) Flow cytometry profiles showing DNA content per cell at indicated time points of GroESL  
753 depletion.

754 (B) Microscopy of fluorescently labeled origins of replication at indicated time points of GroESL  
755 depletion. A fluorescent reporter operator system (FROS) reporter construct bearing *ori::(tetO)n*  
756 *tetR-yfp* was used to mark origins of replication. Arrows indicate location of origin of replication  
757 foci. Images show YFP-phase merge.

758 (C) Microscopy of cells at indicated time points during GroESL depletion, stained with Hoechst  
759 33258 to visualize chromosomes. Arrows indicate gaps in staining associated with inter-  
760 chromosomal spaces.

761 (D) Western blots of cell cycle regulators GcrA, CtrA, CcrM, DnaA, and SciP in wild type (WT)  
762 *C. crescentus* and GroESL depletion strain (*P<sub>xyl</sub>-groESL*), grown either in non-depleting  
763 conditions (+ xyl) or for the indicated time periods in depleting conditions (- xyl). Quantification  
764 of band intensities represent an average of three biological replicates.

765 (E) RNAseq analysis showing normalized expression values for *C. crescentus* transcriptome of  
766 wild type versus GroESL depletion at four hours. Genes with a fold change less than -2 or  
767 greater than 2 are represented by deep pink points. Line represents smoothed conditional mean of  
768 data.

769 (F) Plots as in (E) with the genes belonging to the regulons of GcrA (34), CtrA (36), CcrM (32),  
770 DnaA (35), and SciP (33) highlighted.

**Figure 3**

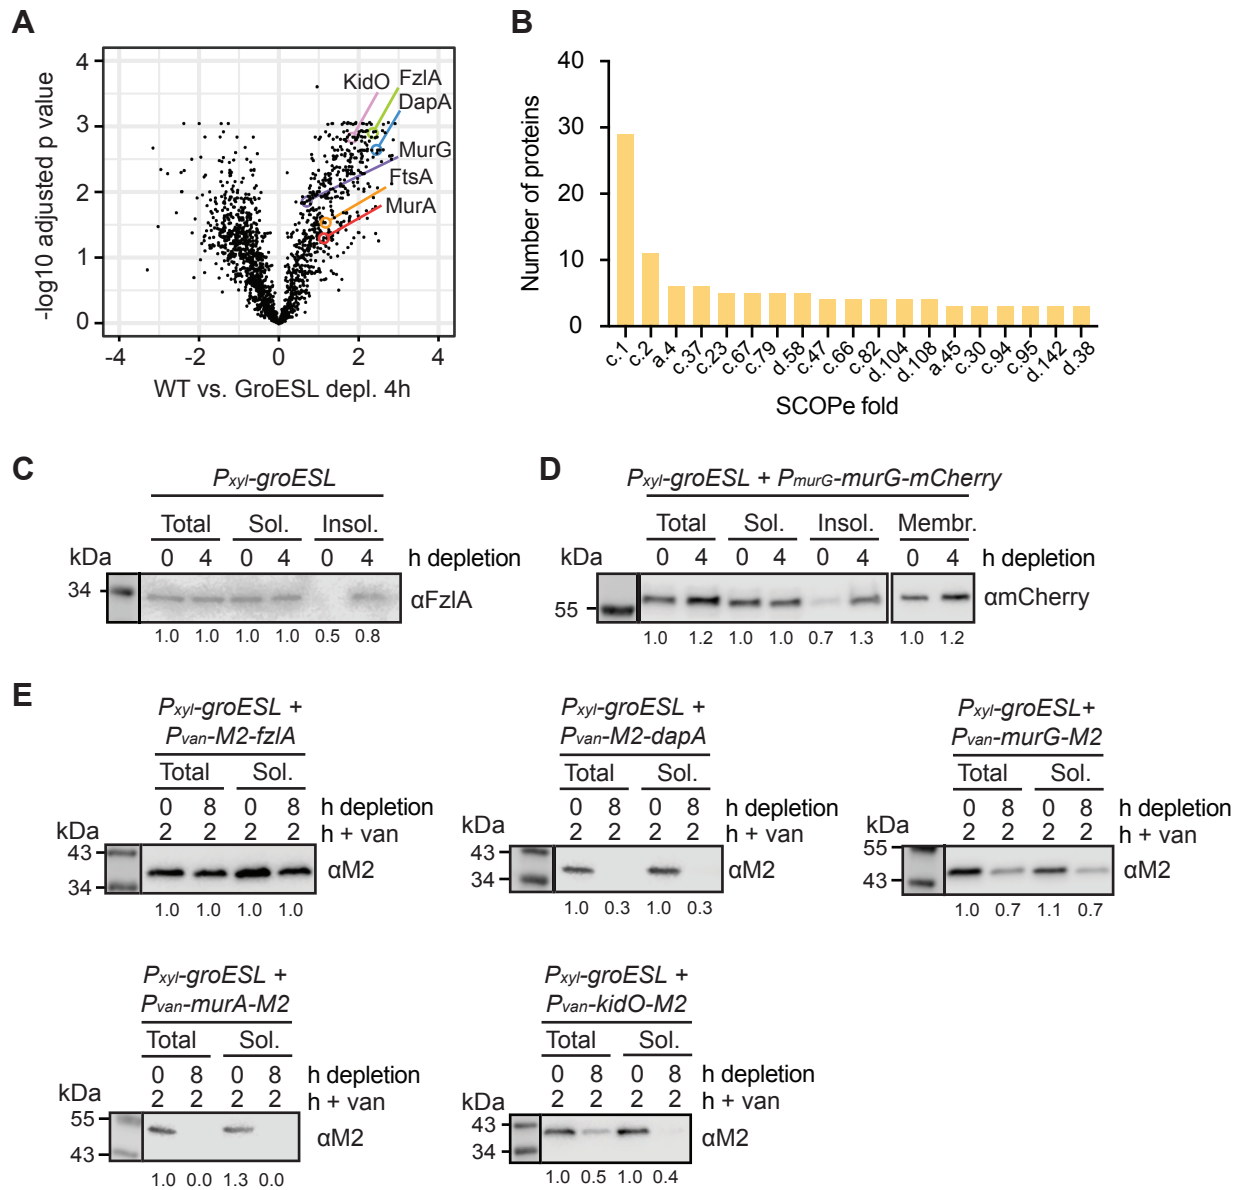

772 **Figure 3: Loss of GroESL is associated with changes in division and cell wall synthesis**  
773 **protein solubility.**

774 (A) Changes in detergent-resistant insoluble fractions between wild type cultures and cultures  
775 depleted of GroESL for four hours, identified by quantitative proteomics. Volcano plot shows  
776 significance (log adjusted P value, calculated using linear model analysis) versus log fold change  
777 WT vs. GroESL depletion 4h. Identified PG synthesis and cell division proteins are indicated.

778 (B) Enrichment of structural folds (SCOPE classification) in proteins of the detergent-resistant  
779 insoluble fraction of cultures depleted of GroESL for four hours. Number of proteins indicates  
780 the absolute number of proteins identified with the indicated fold ID.

781 (C) Western blot of native FzlA abundance in cell lysate (total), soluble (sol.) and insoluble  
782 (insol.) cellular fractions of the GroESL depletion strain (*P<sub>xyI</sub>-groESL*). Samples were taken from  
783 cultures where GroESL was not depleted (0h) as well as cultures where GroESL was depleted  
784 for four hours. Quantification of band intensities represents an average of three biological  
785 replicates.

786 (D) Western blot of native MurG-mCherry abundance in cell lysate (total), soluble (sol.),  
787 insoluble (insol.), and membrane (membr.) cellular fractions of the GroESL depletion strain  
788 (*P<sub>xyI</sub>-groESL*). Samples were taken from cultures where GroESL was not depleted (0h) as well as  
789 cultures where GroESL was depleted for four hours. Quantification of band intensities represents  
790 an average of 3 biological replicates.

791 (E) Solubility of *de novo* synthesized M2-FzlA, M2-DapA, MurG-M2, MurA-M2 and KidO-M2  
792 in cells depleted of GroESL (8h). GroESL was depleted for 0h or 6h prior to induction of M2-  
793 FzlA, M2-DapA, MurG-M2, MurA-M2, and KidO-M2 for 2h from the vanillate-inducible  
794 promoter (*P<sub>van</sub>*). Cultures were harvested and isolated into cell lysate (total) or soluble (sol.)

795 fractions and immunoblotted. Quantification of band intensities represents an average of 3  
796 biological replicates.

**Figure 4**

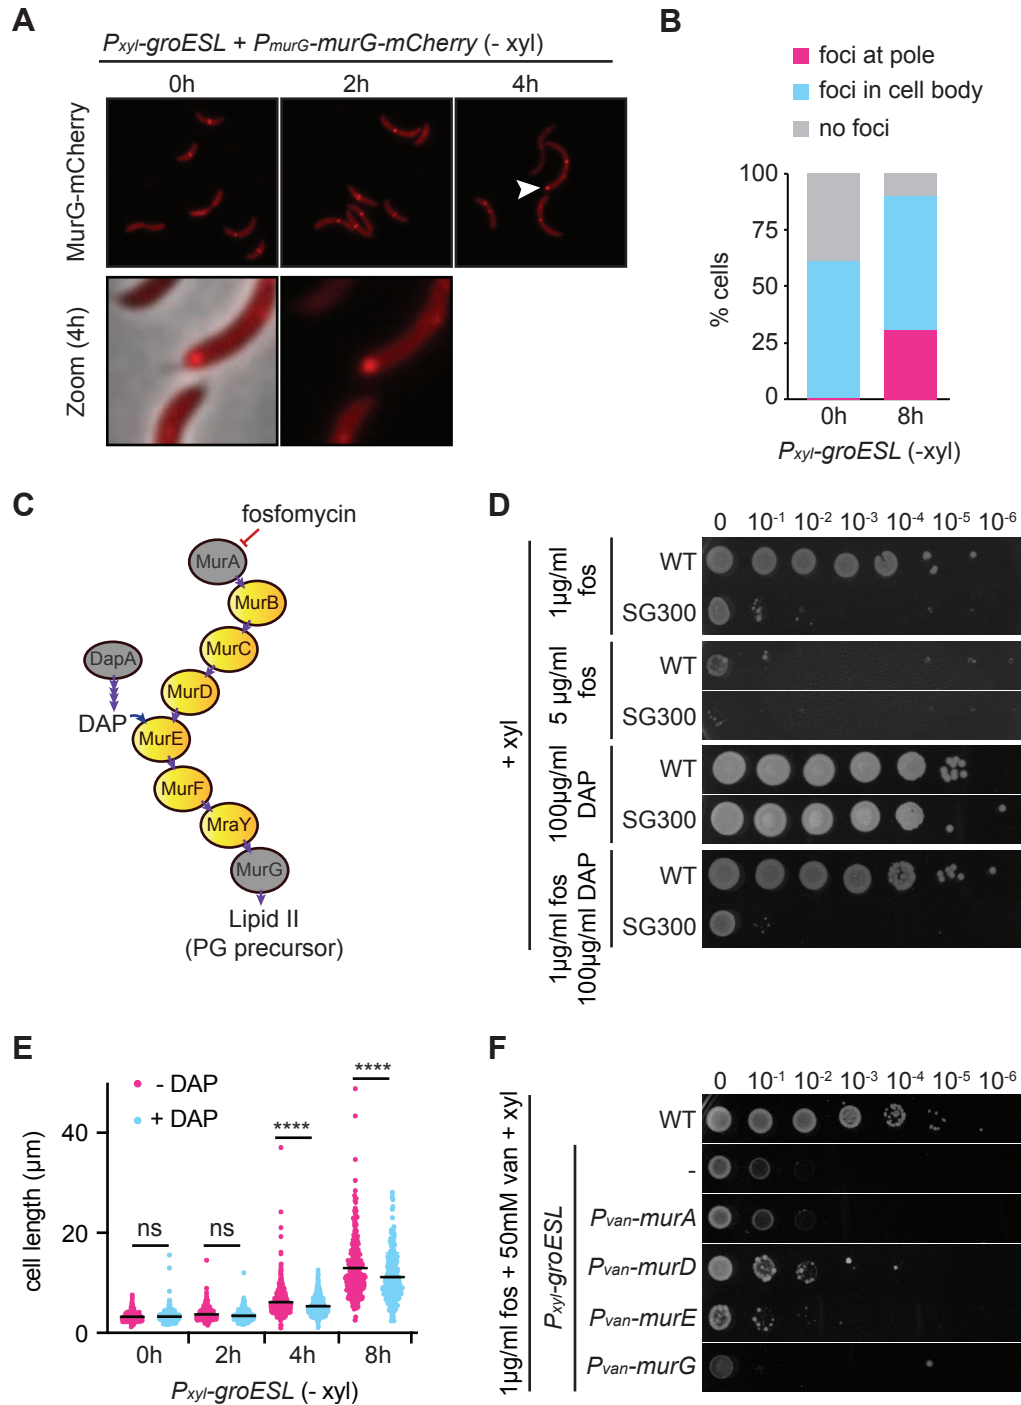

798 **Figure 4: GroESL folding supports PG biosynthesis through MurG, MurA, and DapA.**

799 (A) Microscopy of MurG-mCherry localization during early GroESL depletion (0 to 4h).

800 Representative images are shown, white arrow marks polar MurG-mCherry localization,  
801 magnified in lower panels.

802 (B) Quantification of population location of MurG-mCherry localization patterns before (0h) and  
803 after eight hours of GroESL depletion ( $n < 339$ , graph is average of biological duplicates). Foci  
804 at pole; cell contains at least one focus that is located in the extreme polar region, foci in cell  
805 body; cell contains foci but not located at the pole, no foci; cell contains only diffuse signal.

806 (C) Diagram of PG biosynthetic pathway in *C. crescentus*. Proteins identified in Figure 3A are  
807 highlighted in grey. Important metabolites (DAP, Lipid II) are indicated where they appear in the  
808 pathway, as well as where fosfomycin acts to inhibit MurA. Purple arrows indicate enzymatic  
809 reactions.

810 (D) Spot assay of wild type and GroESL depletion strain (*P<sub>xyI</sub>-groESL*) in the presence of  
811 fosfomycin (fos) and/or DAP. Xylose was included in all agar plates. Images are representative  
812 of 3 biological replicates.

813 (E) Quantification of population cell lengths ( $n < 244$  each population) determined by phase  
814 contrast microscopy of the GroESL depletion strain (*P<sub>xyI</sub>-groESL*) during depletion (-xyI) in the  
815 presence or absence of 100 $\mu$ g/ml DAP (\*\*\*\*,  $p < 0.0001$ ).

816 (F) Spot assay of wild type and derivatives of the GroESL depletion strain (*P<sub>xyI</sub>-groESL*)  
817 harboring chromosomally-encoded, inducible genes encoding the PG biosynthetic pathway  
818 proteins MurA-M2, MurD-M2, MurE-M2 or MurG-M2 when treated with fosfomycin (fos).  
819 Xylose was included in all agar plates to support GroESL expression, and vanillate was included  
820 to induce the expression of PG biosynthesis proteins. The GroESL depletion strain (*P<sub>xyI</sub>-groESL*)

821 without integrated plasmids is included as a control (-). Images are representative of 3 biological  
822 replicates.

## Figure 5

**A**

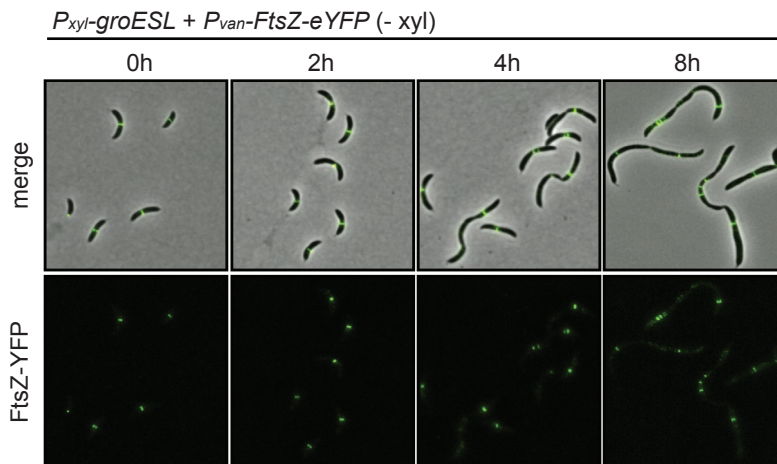

**B**

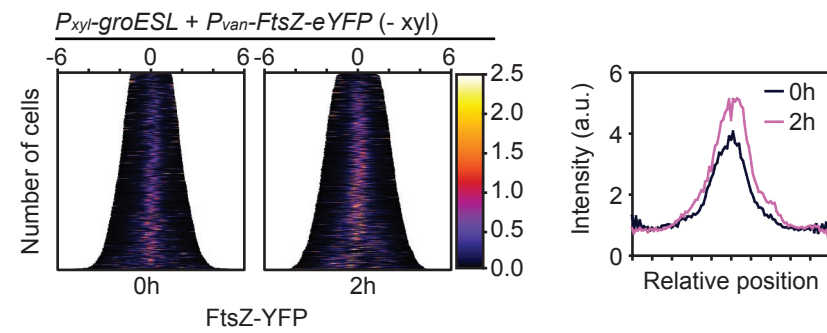

**C**

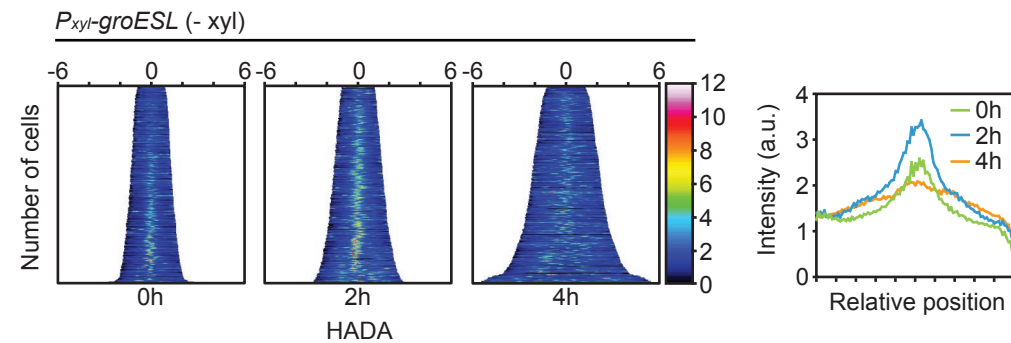



824 **Figure 5: The Z-ring stalls shortly after GroESL levels decline.**

825 (A) Microscopy of FtsZ-eYFP localization in the GroESL depletion strain during depletion (-  
826 xyl). FtsZ-eYFP was expressed from the vanillate-inducible promoter ( $P_{van-ftsZ-eYFP}$ ) for two  
827 hours prior to imaging each time point of GroESL depletion. Representative micrographs are  
828 shown.

829 (B) Demographs showing fluorescent signal profiles of FtsZ-eYFP in early GroESL depletion (0-  
830 2h), organized by cell length (n < 308 each population). Fluorescent profiles are organized by  
831 cell length.

832 (C) Demographs of population fluorescence intensity profiles of HADA stain (n < 334 each  
833 population). Cultures were depleted of GroESL for the indicated time periods and exposed to a  
834 short pulse (2 min) of HADA prior to fixation and imaging. Population intensity profiles are  
835 organized by cell length.

**Figure 6**

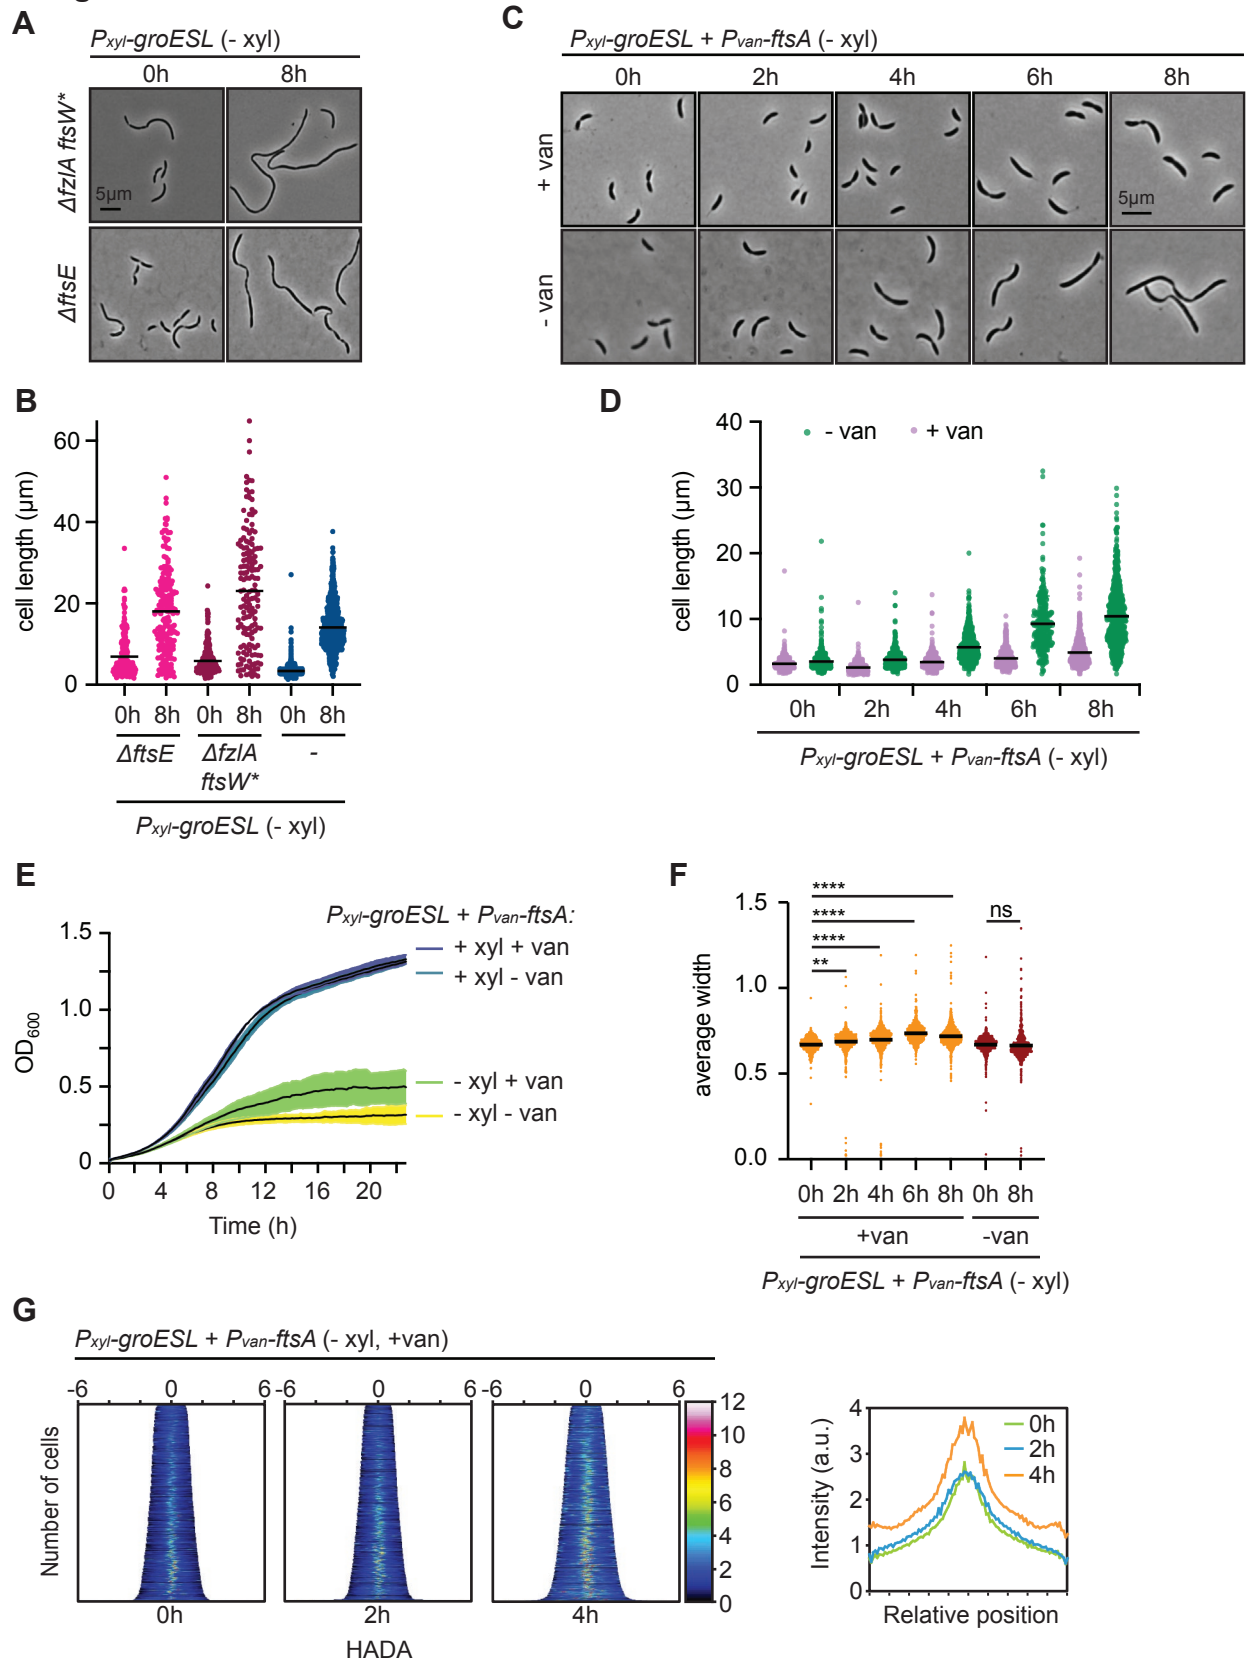

837 **Figure 6: GroESL folding regulates FtsZ ring function through FtsA, not FzlA or FtsE.**

838 (A) Microscopy of strains lacking FzlA ( $\Delta fzlAftsW^*$ ) or FtsE ( $\Delta ftsE$ ) before and eight hours after  
839 GroESL depletion.

840 (B) Quantification of population cell lengths of the strains shown in (A), compared with  
841 population cell lengths of the parent GroESL depletion strain (shown in blue).

842 (C) Microscopy of GroESL depletion with induced expression of *ftsA* from a second  
843 chromosomal locus. Vanillate-dependent *ftsA* expression was induced at the onset of GroESL  
844 depletion (0h). Microscopy images of isogenic cultures during GroESL depletion, grown without  
845 the addition of vanillate (-van) are shown for comparison.

846 (D) Quantification of population cell lengths of (C) ( $n < 299$ , each population). Isogenic cultures  
847 were grown with (+van) or without (-van) the addition of vanillate and population cell lengths  
848 quantified.

849 (E) Growth curve assessing biosynthetic capacity of the GroESL depletion strain ( $P_{xyl-groESL}$ )  
850 producing additional FtsA. Isogenic cultures were grown in the presence or absence of xylose  
851 (+/- xyl) and the presence or absence of vanillate (+/- van) to determine growth effects.

852 (F) Quantification of population mean widths of cells producing extra FtsA. Cell widths were  
853 measured in populations from (C) and (D). ANOVA was used to determine population  
854 differences (\*\*,  $p < 0.0013$ , \*\*\*\*,  $p < 0.0001$ ).

855 (G) Population fluorescence intensity profiles of HADA stain for populations of GroESL-  
856 depleted cultures producing extra FtsA ( $n < 502$ , each population). Cultures were depleted of  
857 GroESL for the indicated time periods with vanillate-dependent expression of FtsA induced at  
858 the onset of depletion (0h). At the indicated time points cultures were exposed to a short pulse (2

859 min) of HADA prior to fixation and imaging. Population intensity profiles are organized by cell  
860 length.

Figure 7

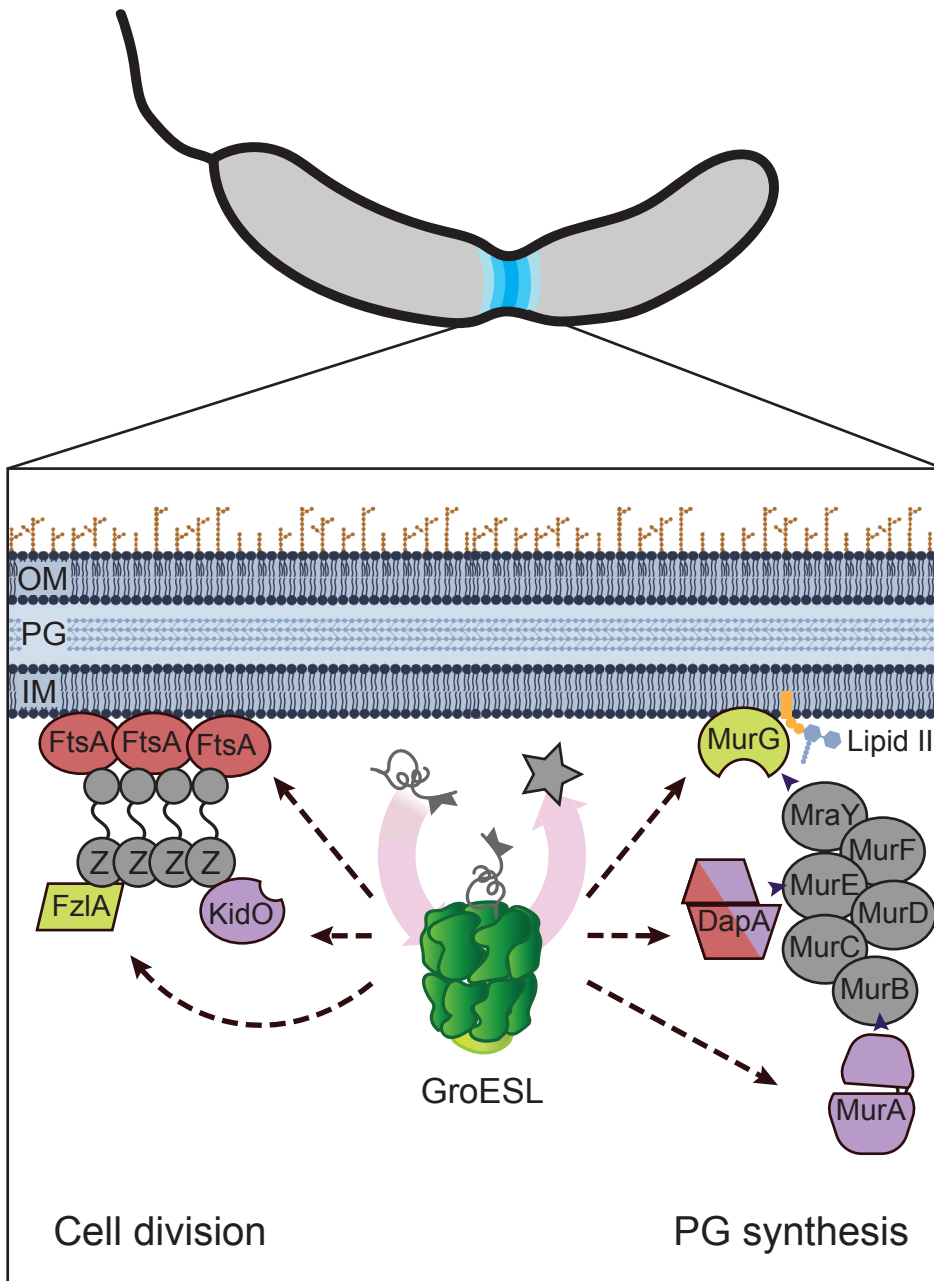

862 **Figure 7: Model of GroESL folding supporting *Caulobacter crescentus* cell envelope**

863 **biosynthesis and cell division.**

864 GroESL supports the function of several division proteins and peptidoglycan biosynthetic  
865 enzymes during *C. crescentus* division, and is most critically required for supporting FtsA. The  
866 chaperonin GroESL is a foldase that assists in moving client proteins from folding intermediates  
867 to native folded proteins (star). GroESL folding supports solubility of FtsA, FzlA, and KidO in  
868 the divisome, and MurG, DapA, and MurA in the PG biosynthetic pathway (metabolite flow  
869 from candidate GroESL client proteins indicated by arrowheads). Proteins in red (FtsA, DapA)  
870 are able to temporarily rescue the GroESL depletion filamentation phenotype if provided in  
871 excess or if their function is bypassed. FtsA interacts with FtsZ (Z) to anchor FtsZ filaments to  
872 the membrane and regulate its dynamics during division. Proteins in purple (DapA, MurA,  
873 KidO) are degraded if synthesized in the absence of sufficient GroESL folding. Proteins in green  
874 exhibit altered localization. Proteins in grey do not decrease solubility during GroESL depletion.  
875 Dashed lines represent interactions that may proceed through an as of yet unidentified  
876 intermediate. OM; outer membrane, PG; peptidoglycan, IM; inner membrane. Membrane and PG  
877 images created with Biorender (Biorender.com).

878 **Supplemental Information**

879 **Supplemental Figure 1**

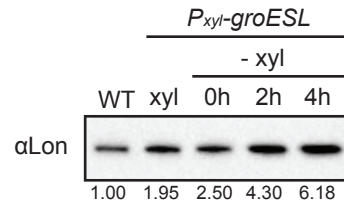

880

881 **Supplemental Figure 1: The Lon protease is upregulated upon GroESL depletion.**

882 Western blot showing Lon abundance in wild type (WT) *C. crescentus* and the GroESL  
883 depletion strain (*P<sub>xyl</sub>-groESL*), grown either in non-depleting conditions (+ xyl) or for 0, 2 and 4  
884 hours in depleting conditions (- xyl). Quantification of band intensities represent an average of  
885 three biological replicates.

## Supplemental Figure 2

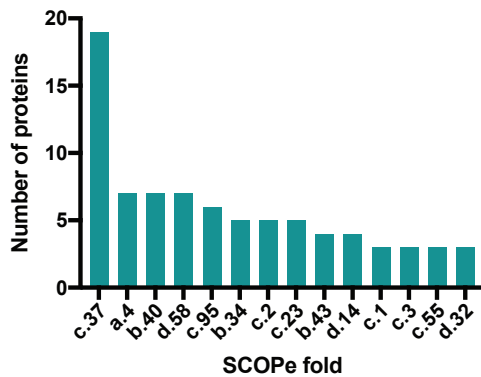

886

887 **Supplemental Figure 2: Fold distribution of aggregated proteins in heat stress.**

888 Enrichment of structural folds (SCOPe classification) in proteins of the detergent-resistant

889 insoluble fraction of wild type *C. crescentus* cultures exposed to 45°C for one hour. Number of

890 proteins indicates the absolute number of proteins identified with the indicated fold ID. Data set

891 was used from (39).



### Supplemental Figure 3

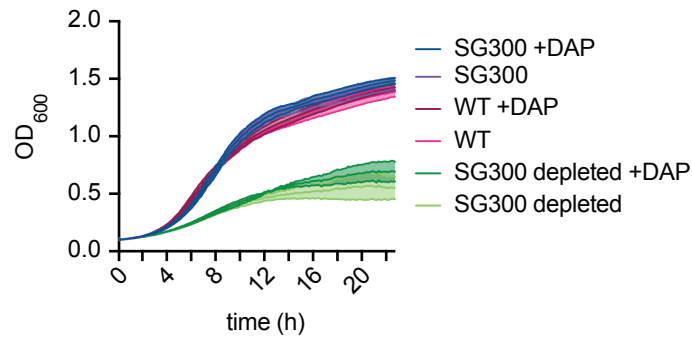

892

893 **Supplemental Figure 3: Growth curve during DAP supplementation in GroESL depletion.**

894 Growth curve assessing biosynthetic capacity of wild type and GroESL depletion strains in the

895 presence and absence of 100µg/ml DAP. Cultures were prepared at an OD of 0.1 and depleted

896 prior to adding to the plate containing the appropriate additives where necessary.

## Supplemental Figure 4

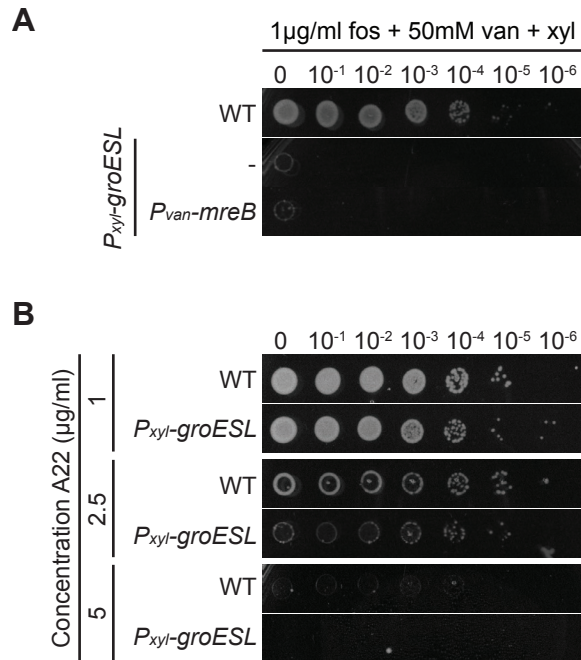

897

898 **Supplemental Figure 4: MreB does not mediate the GroESL-dependent PG defect.**

899 (A) Spot assay of wild type and derivative of the GroESL depletion strain (*P<sub>xyl</sub>-groESL*)

900 harboring a chromosomally-encoded, inducible M2-MreB when treated with fosfomycin (fos).

901 Xylose was included in all agar plates to support GroESL expression, and vanillate was included

902 to induce the expression of MreB. The GroESL depletion strain (*P<sub>xyl</sub>-groESL*) without integrated

903 plasmids is included as a control (-). Images are representative of 3 biological replicates.

904 (B) Spot assay of wild type and GroESL depletion strain (*P<sub>xyl</sub>-groESL*) in the presence of the

905 MreB inhibitor A22. Xylose was included in all agar plates. Images are representative of 3

906 biological replicates.

## Supplemental Figure 5

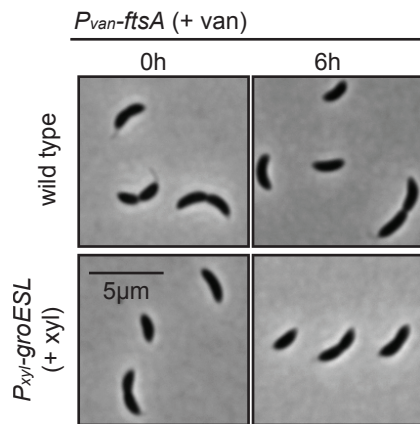

907

### 908 **Supplemental Figure 5: Phenotype of FtsA expression from a second chromosomal locus.**

909 Microscopy of induced expression of *ftsA* from a second chromosomal locus in wild type and  
910 GroESL depletion strain (+xyl). Microscopy images are shown from exponentially growing  
911 cultures prior to *ftsA* induction (0h), and after vanillate-dependent *ftsA* expression was induced  
912 and maintained in exponentially growing cultures for 6h.

913

### 914 **Supplemental Table 1: RNAseq data**

915

### 916 **Supplemental Table 2: Proteomics data**

917

### 918 **Supplemental Table 3: Strain and plasmid list**

919

### 920 **Supplemental Movie 1: Dynamics of FtsZ condensation during GroESL depletion.**
